# Supplementary material for: Human adipose-derived mesenchymal stem cells prevent type 1 diabetes induced by immune checkpoint blockade
Source: PubMed Central journal article supplement (PMC9174328; doi:10.1007/s00125-022-05708-3), 2022-05-05
Supplement: 125_2022_5708_MOESM1_ESM.pdf [file 125_2022_5708_MOESM1_ESM.pdf]

**(a) CD3/Insulin**

**Control1**

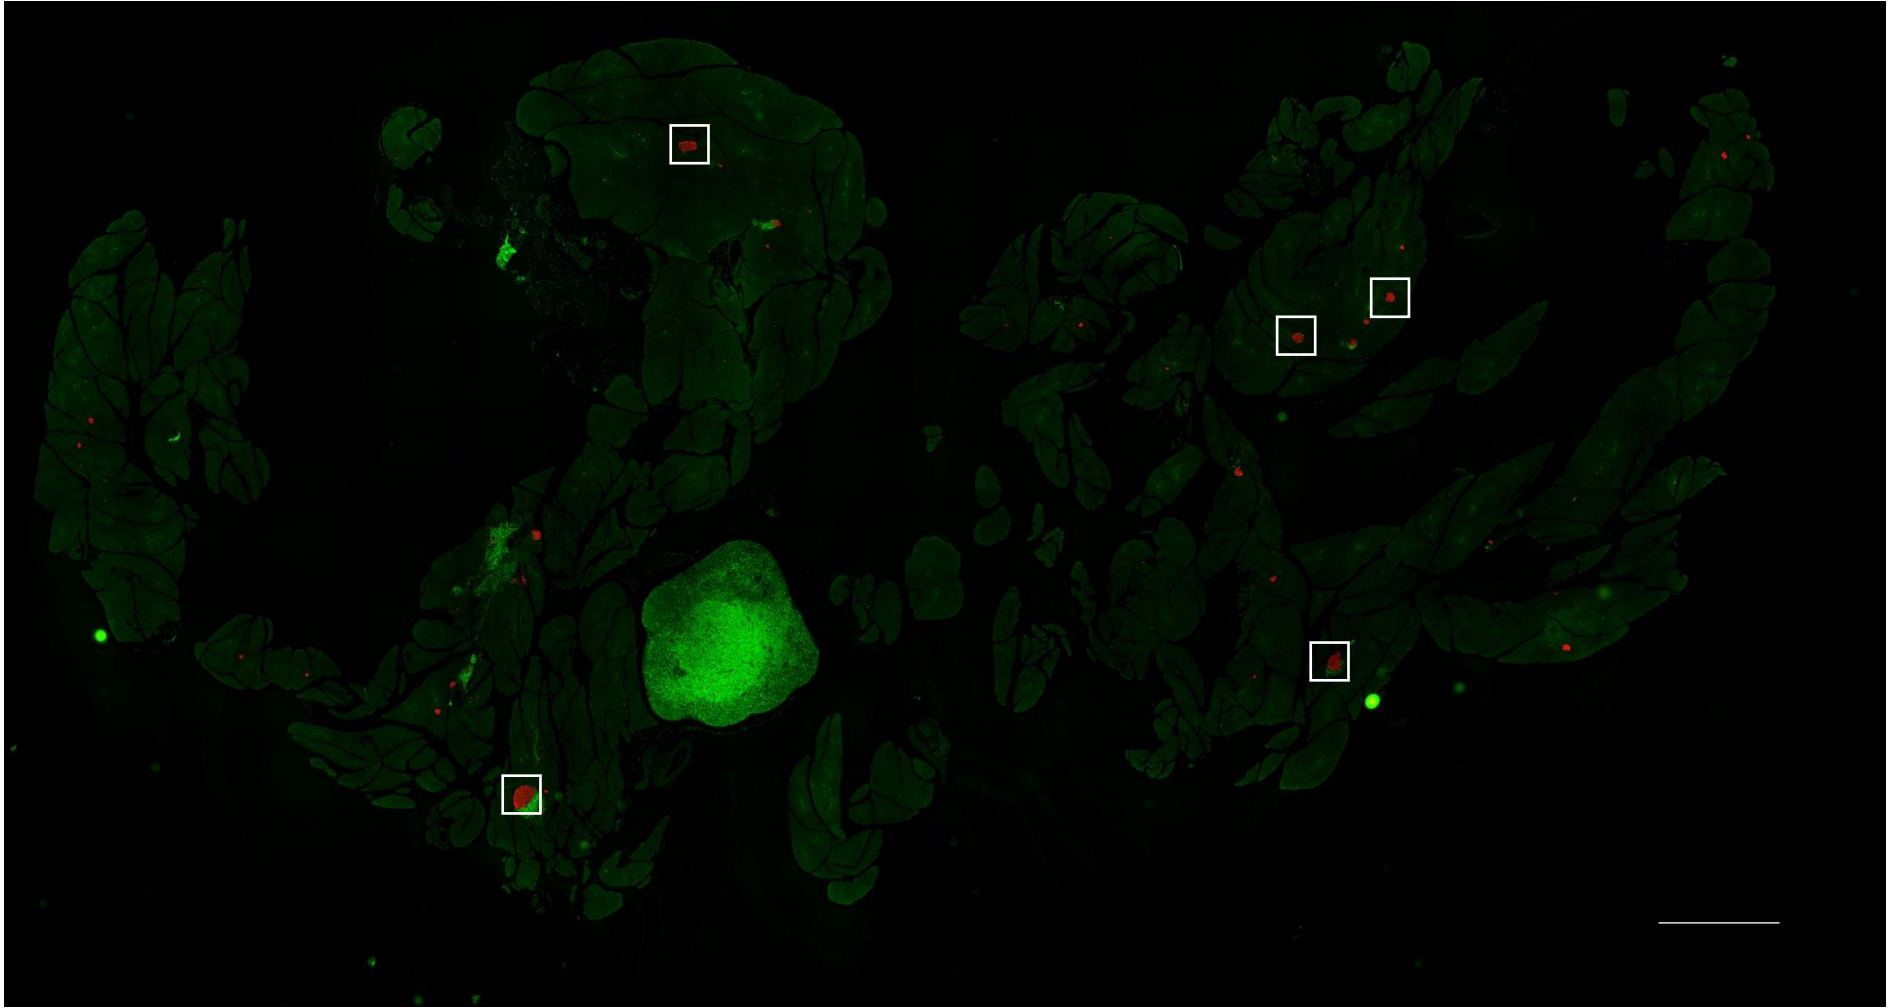

**Control2**

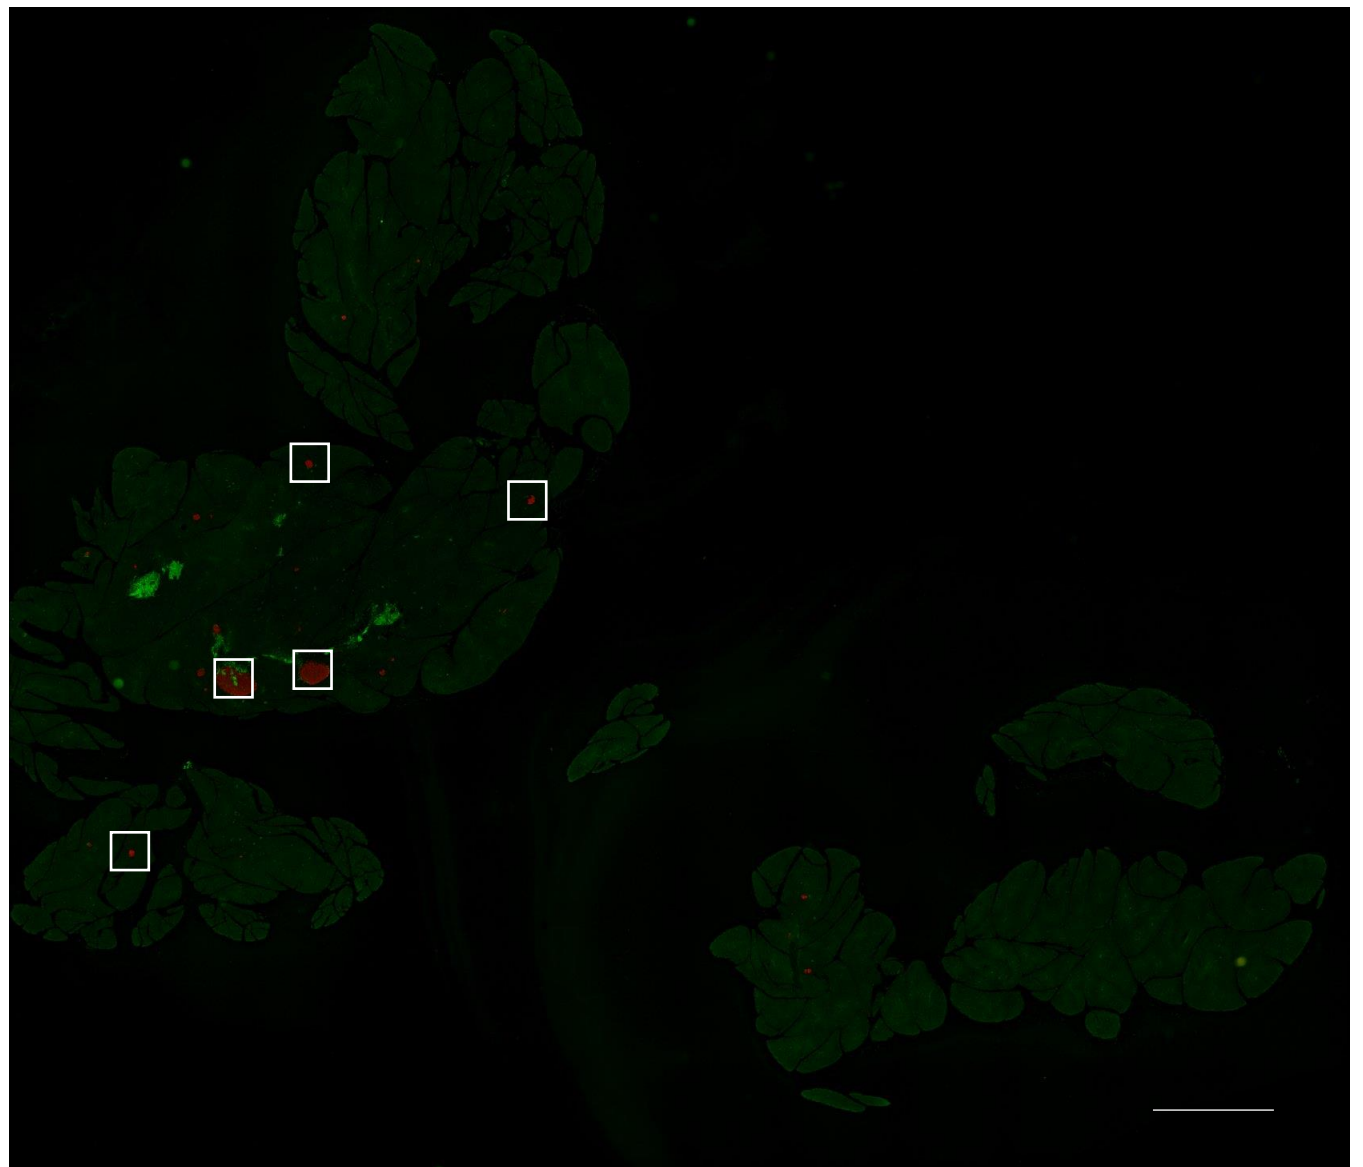

### Control3

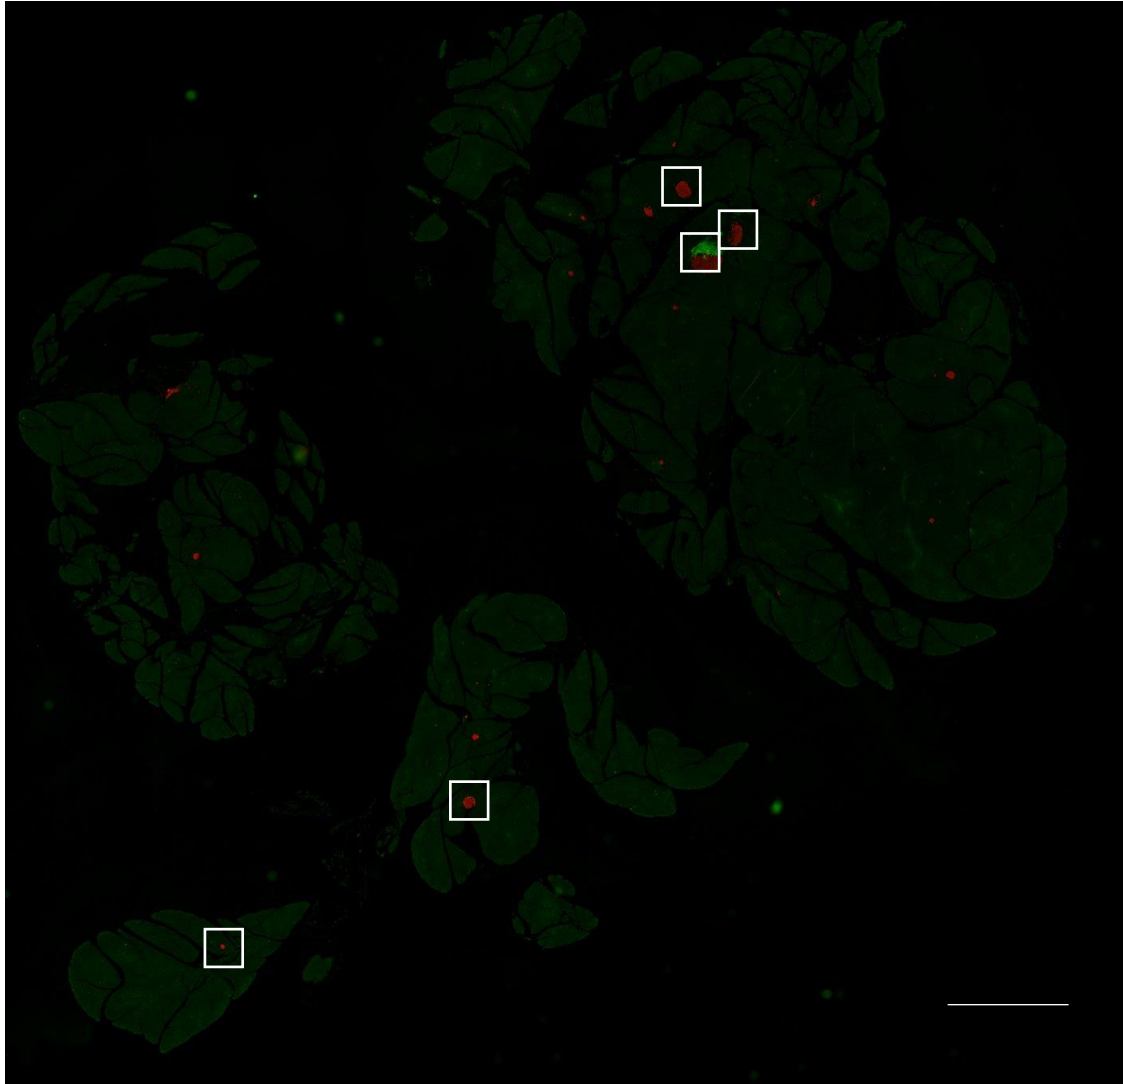

**MSC(-) 1**

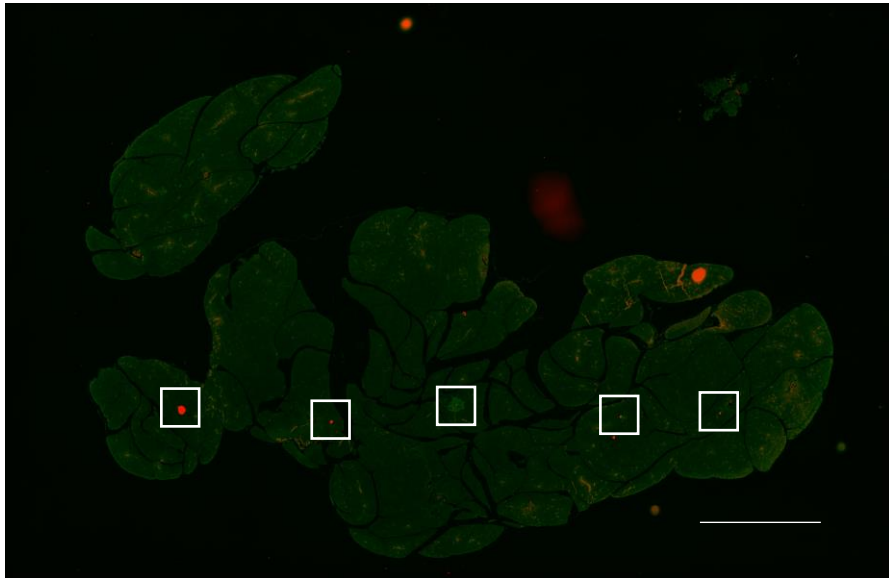

**MSC(-) 2**

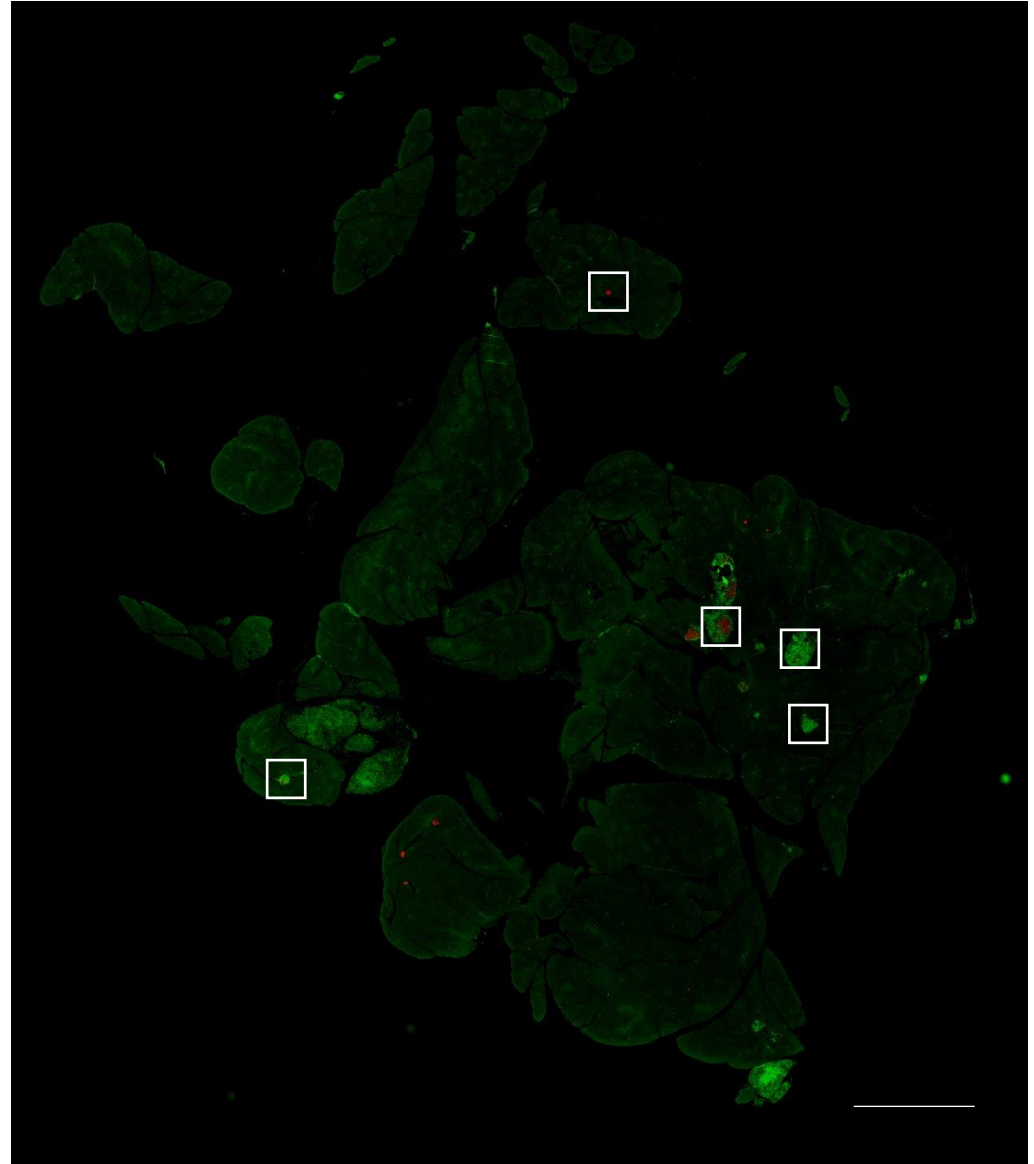

**MSC(-) 3**

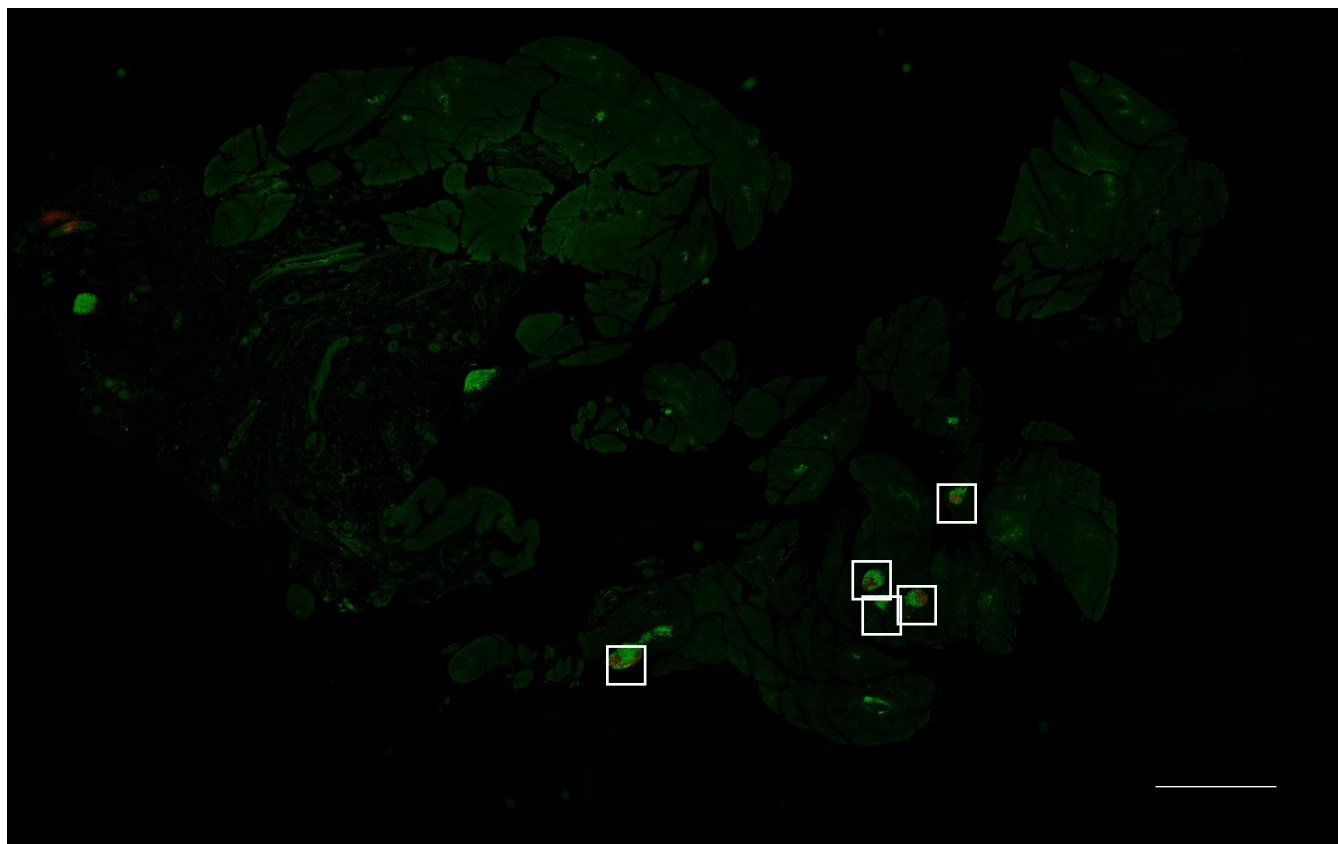

**MSC(+)** 1

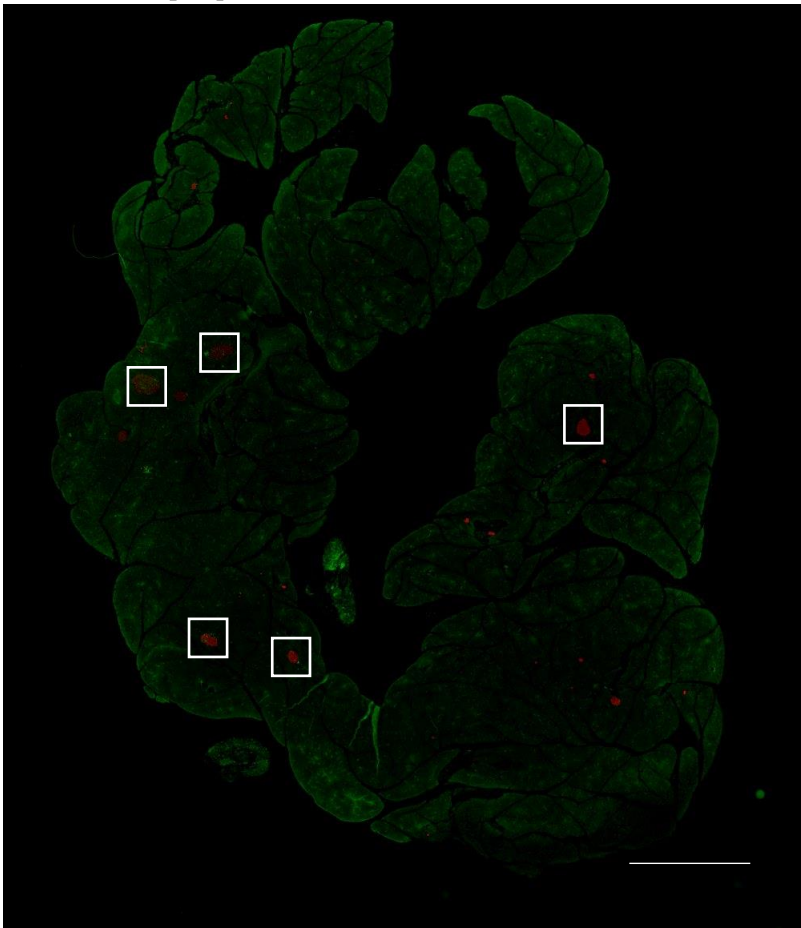

**MSC(+)** 2

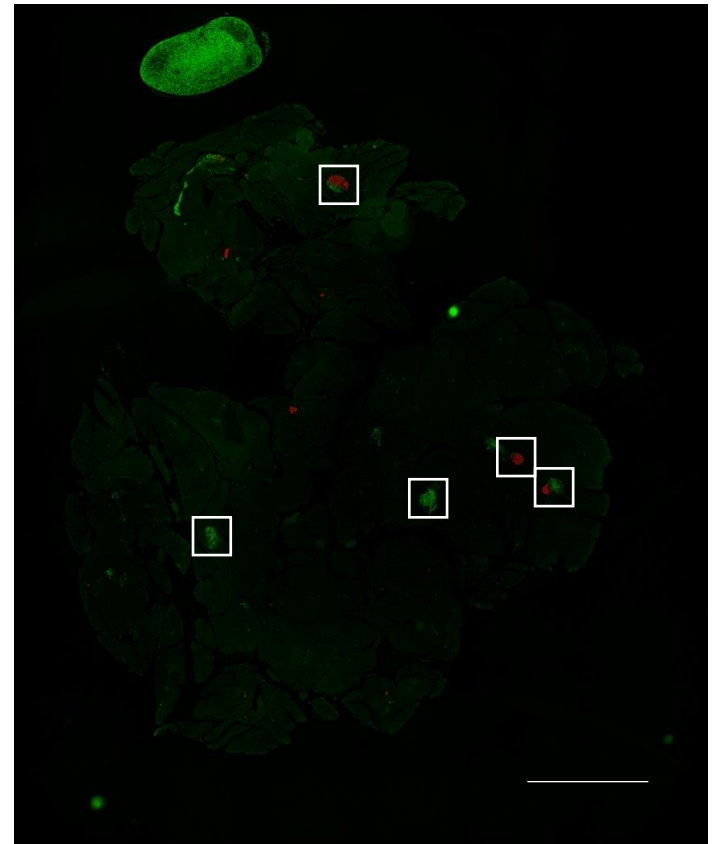

**MSC(+)** 3

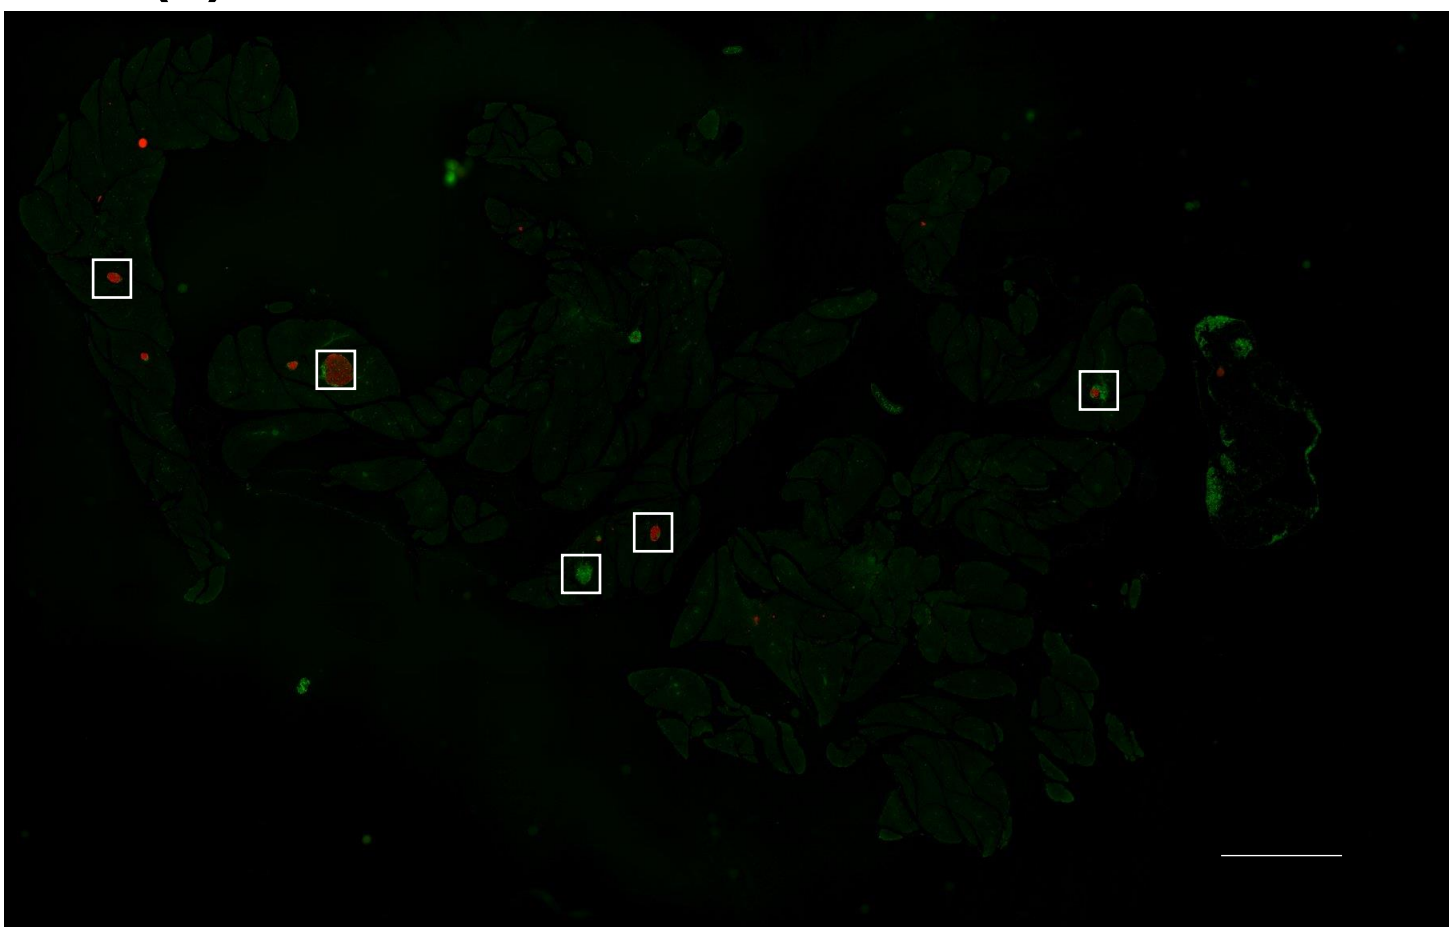

continue **(b) Mac-2/Insulin**

**Control1**

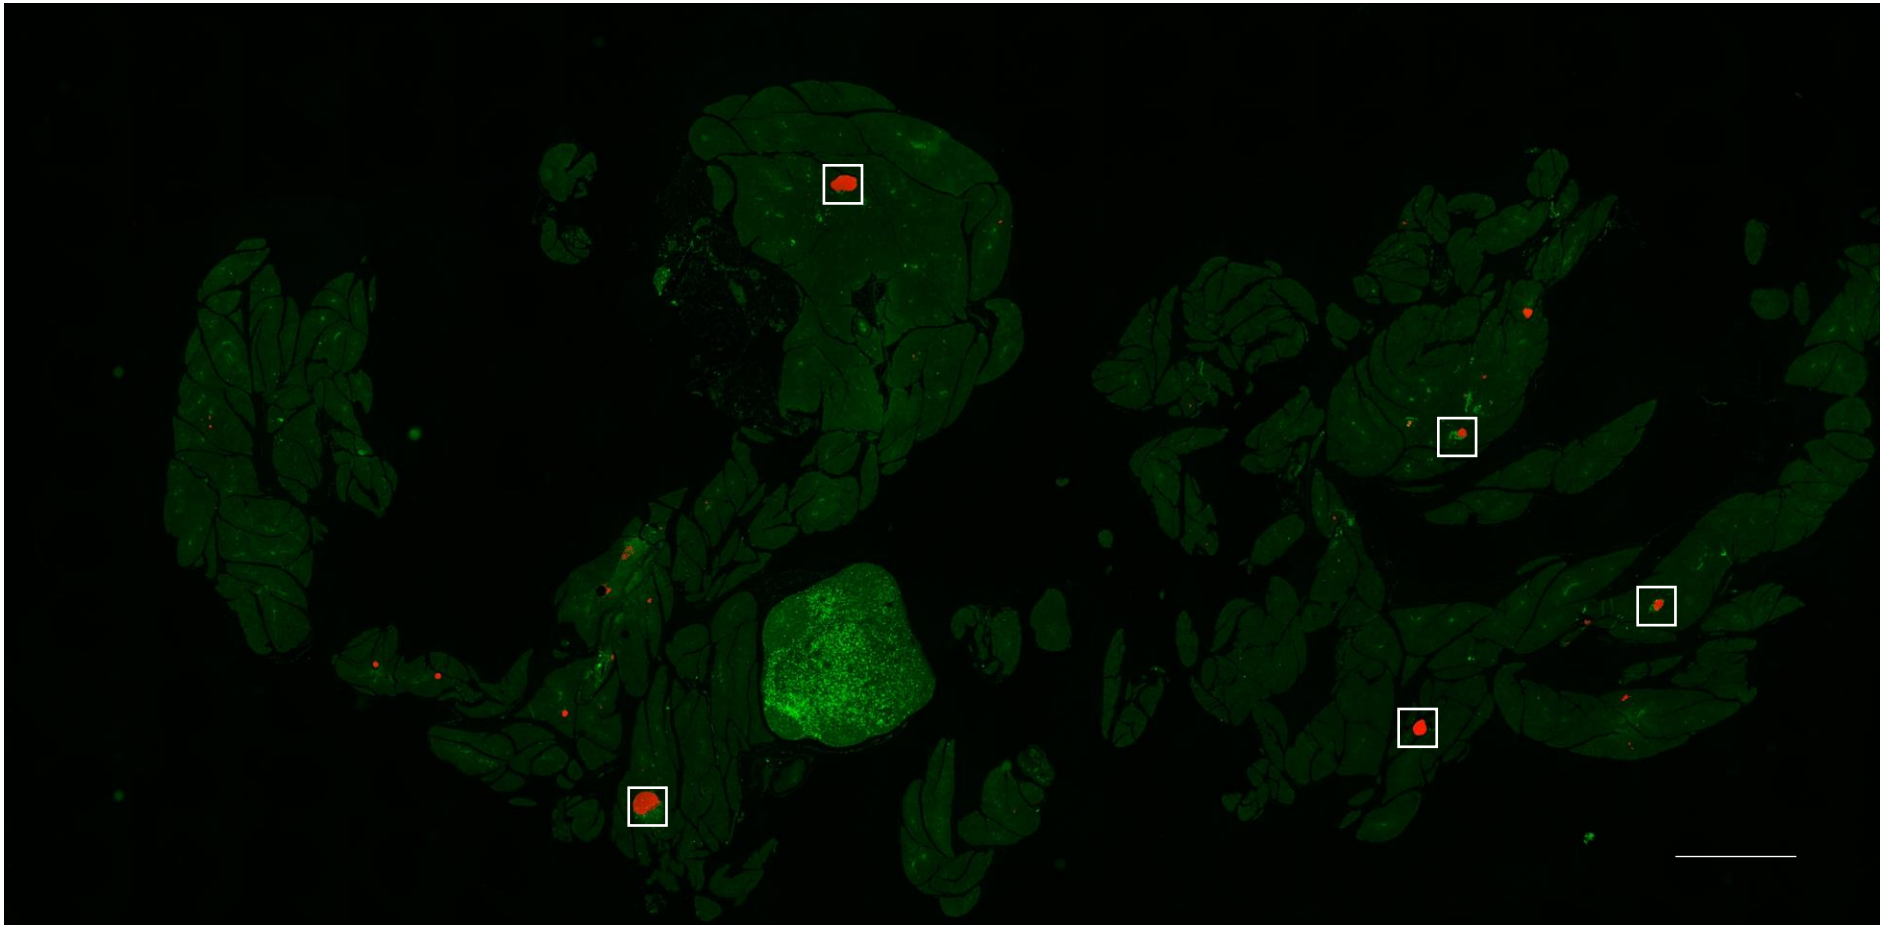

**Control2**

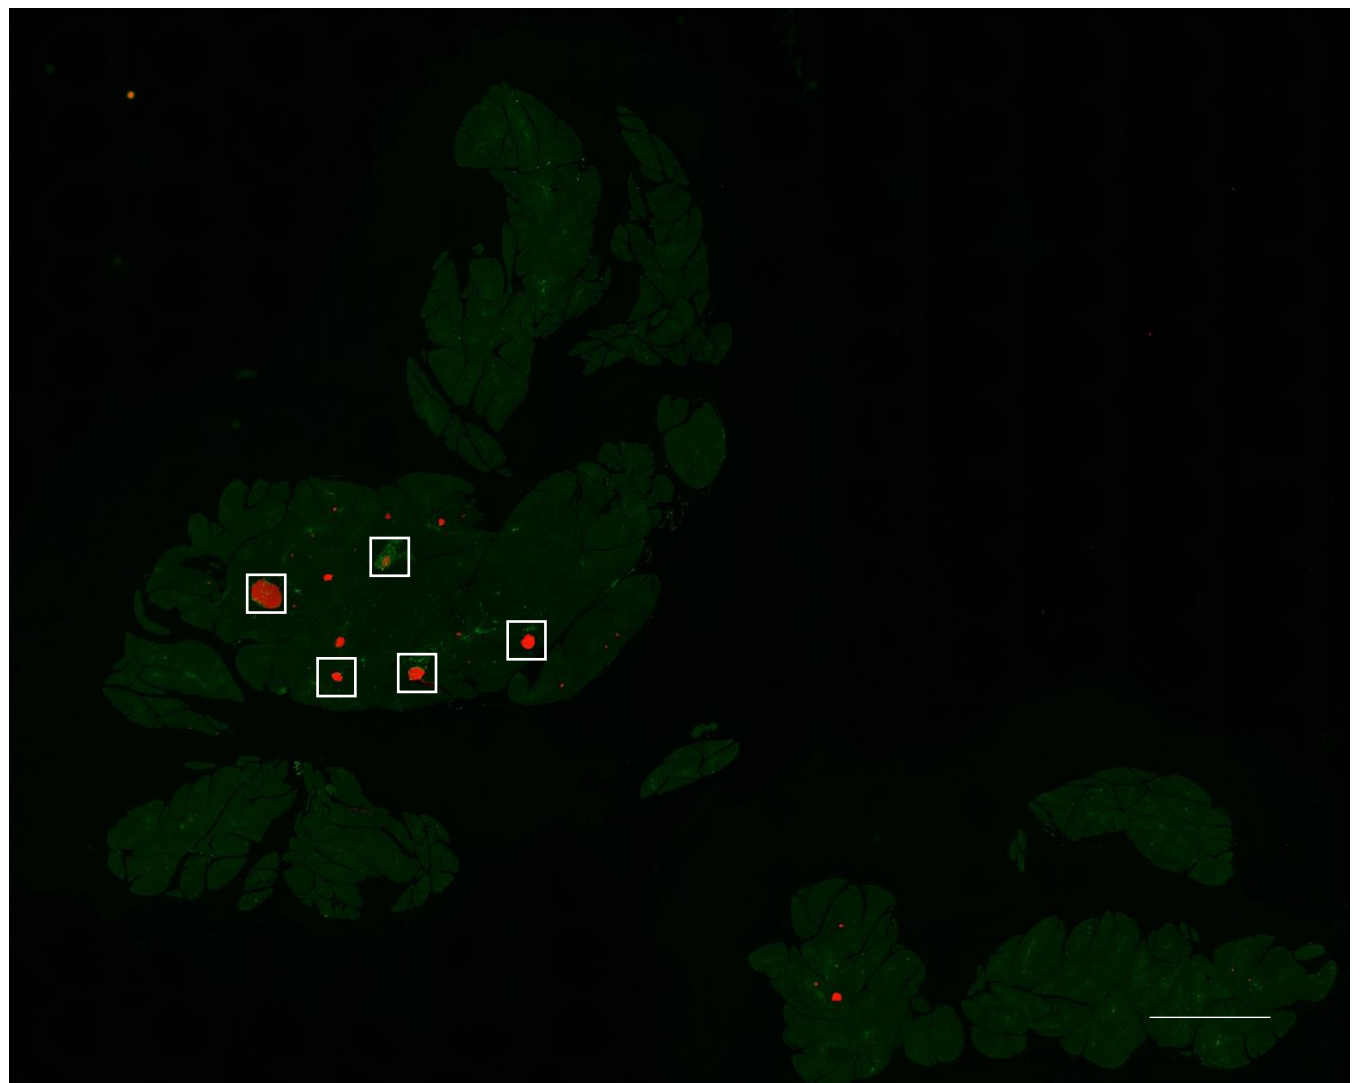

### Control3

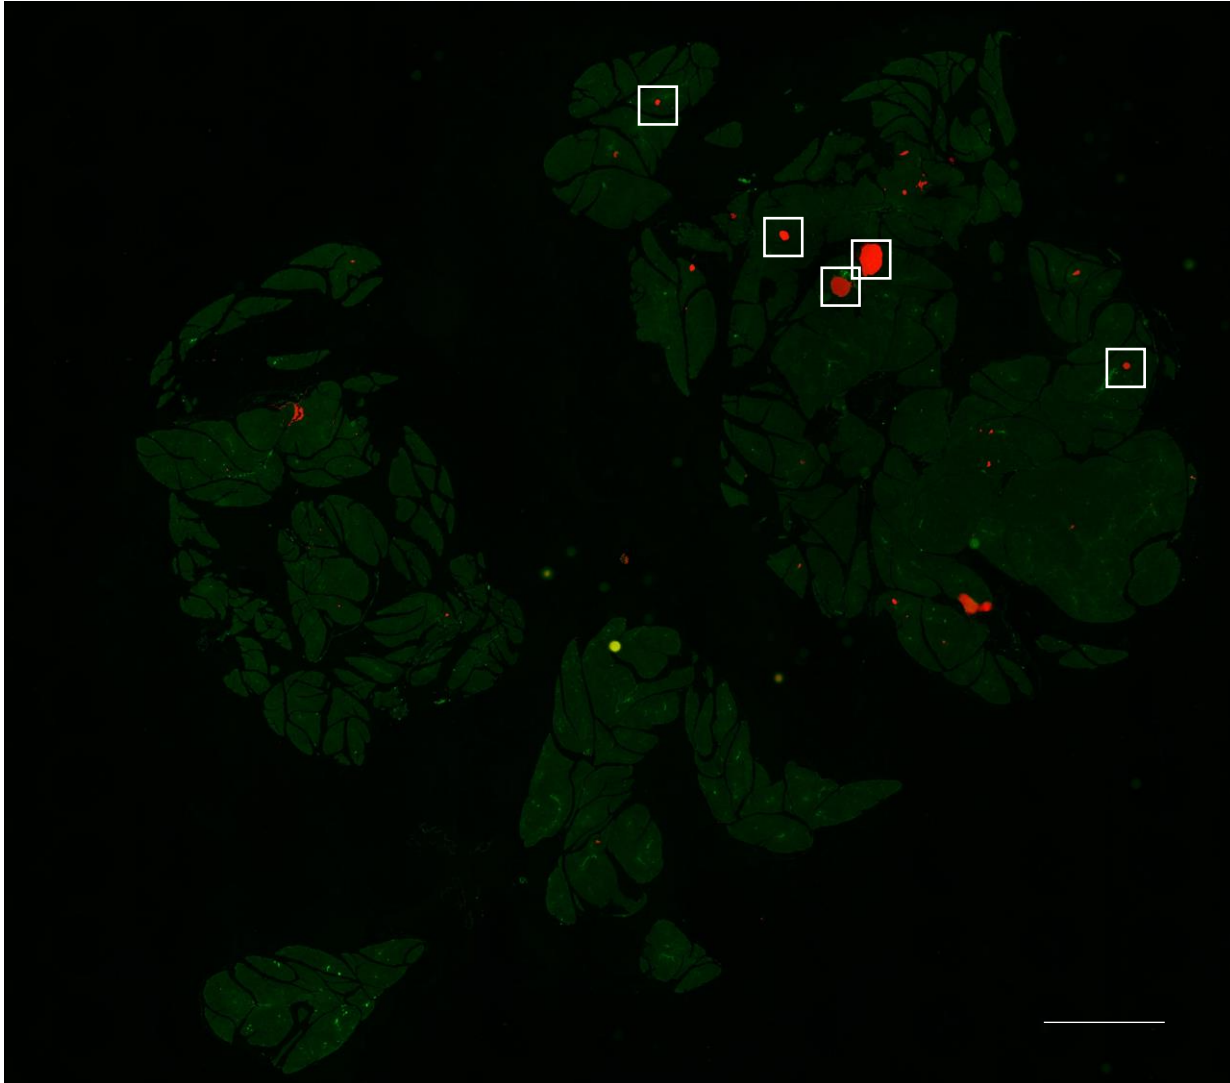

**MSC(-) 1**

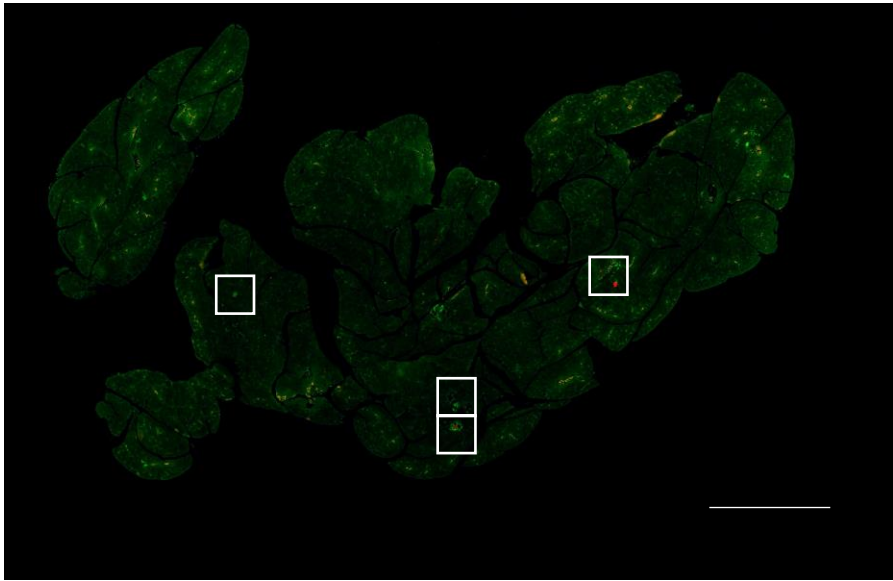

**MSC(-) 2**

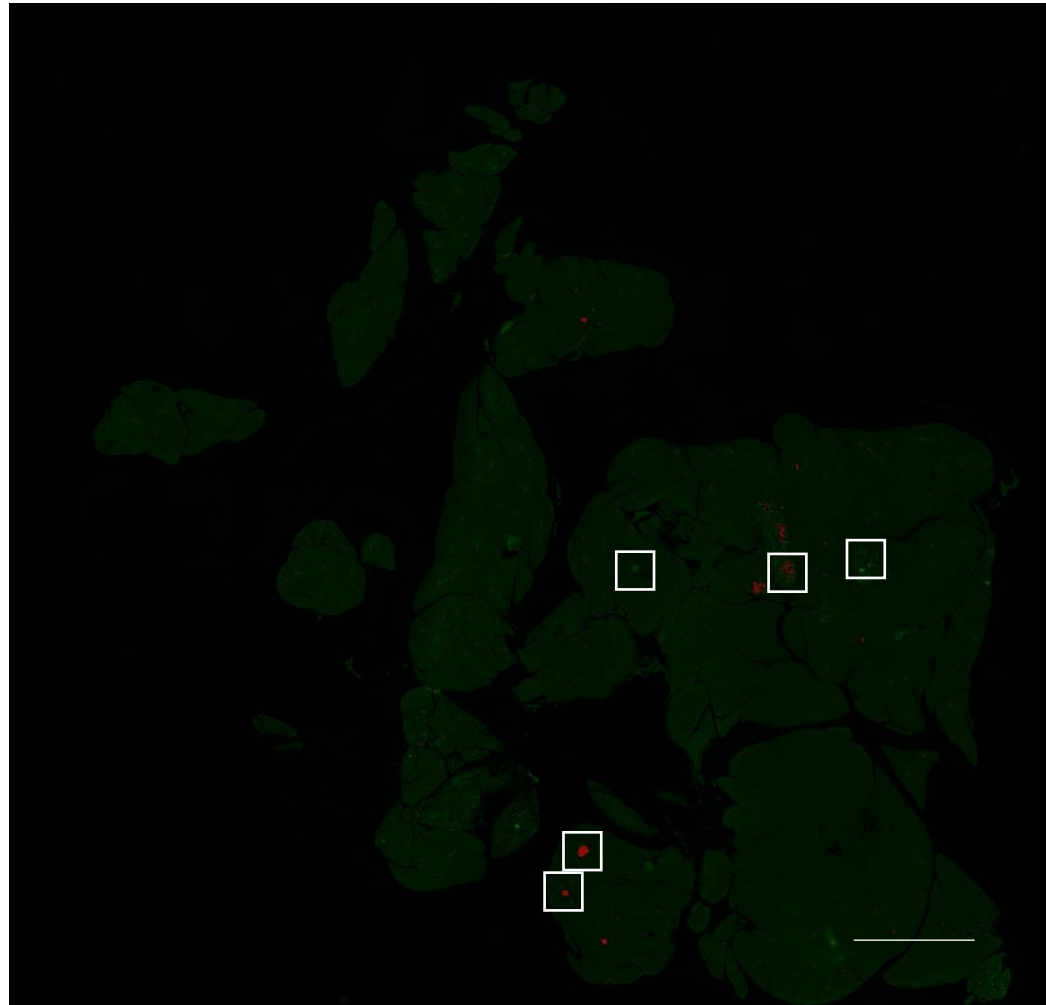

**MSC(-) 3**

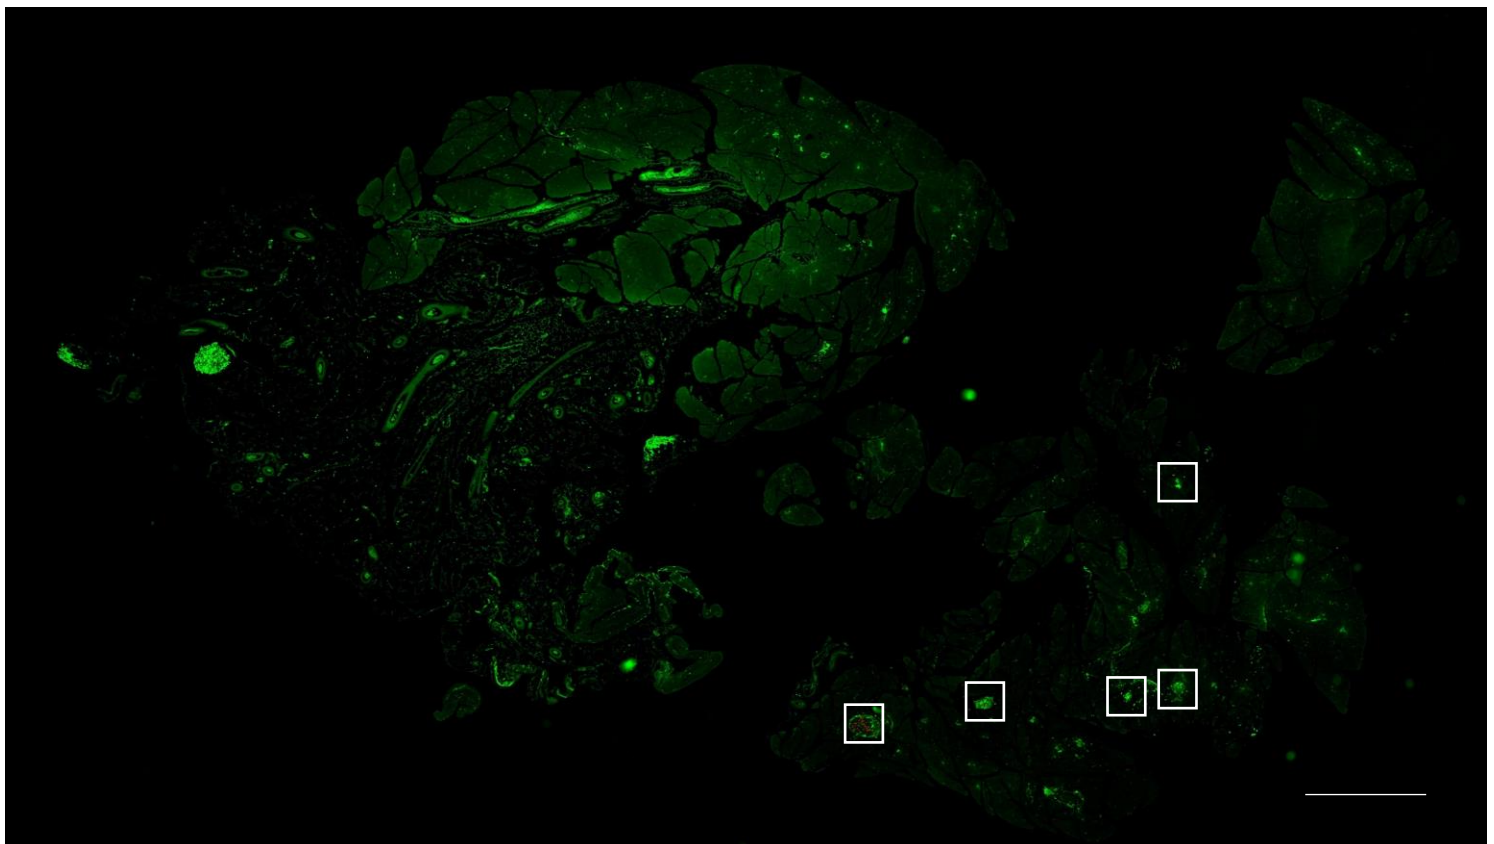

**MSC(+)** 1

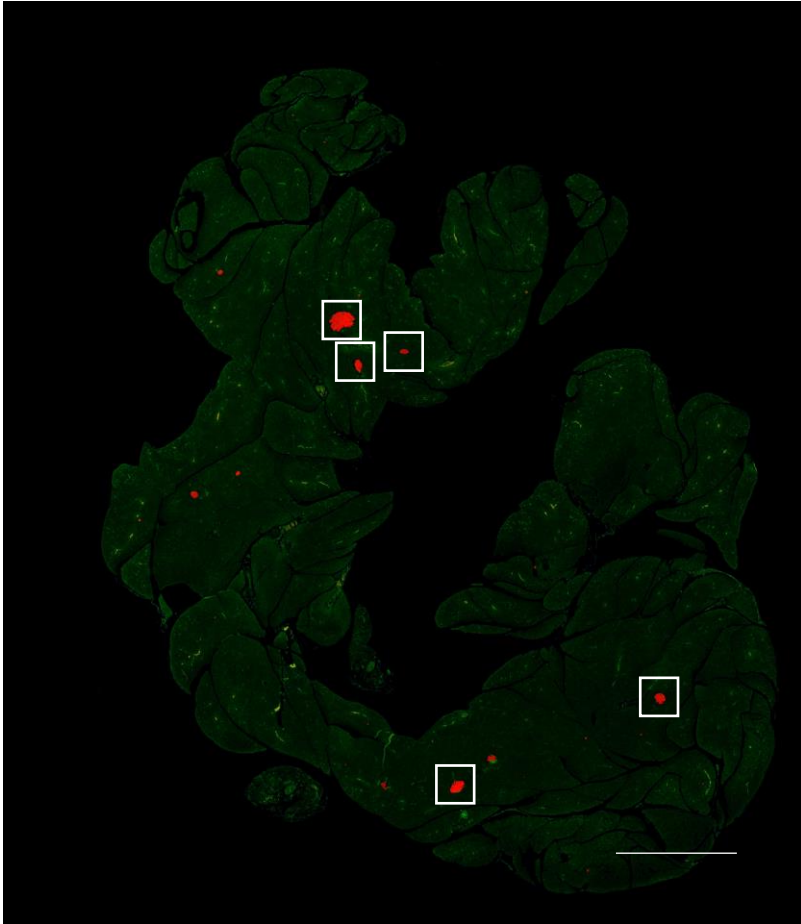

**MSC(+)** 2

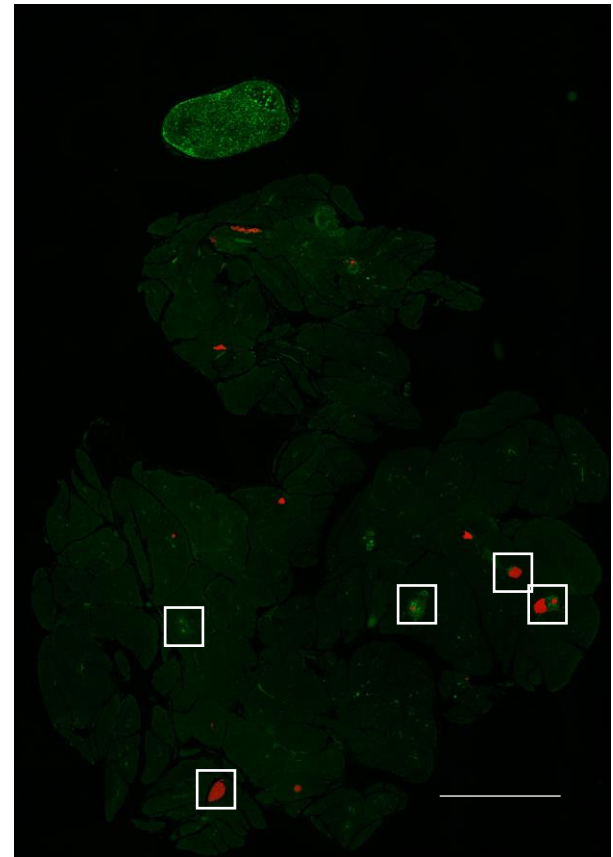

**MSC(+)** 3

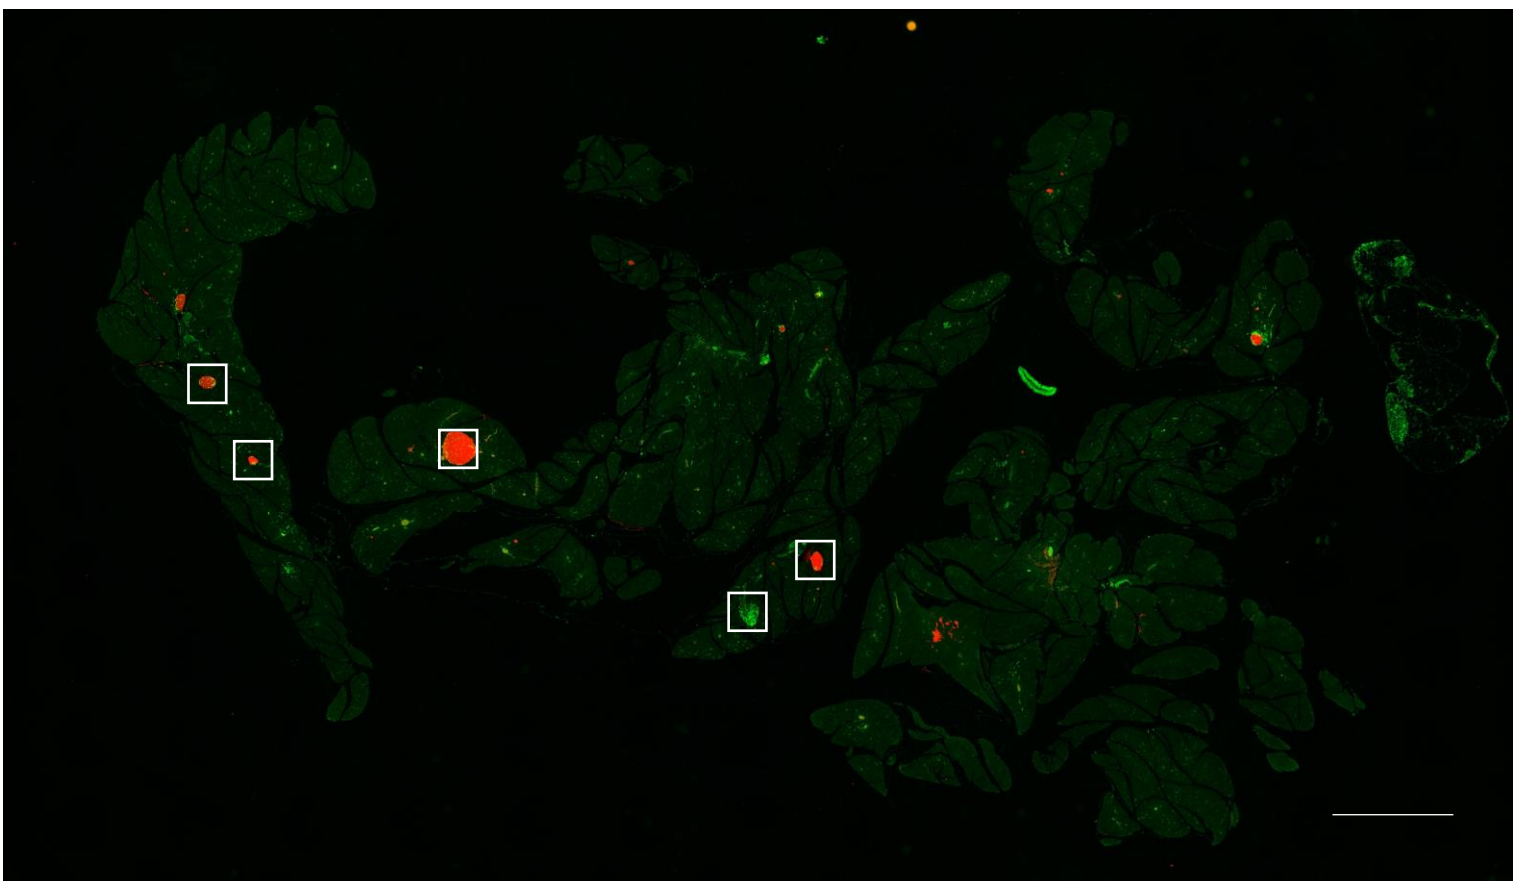



continue **(c) CXCL9/Insulin**

**Control1**

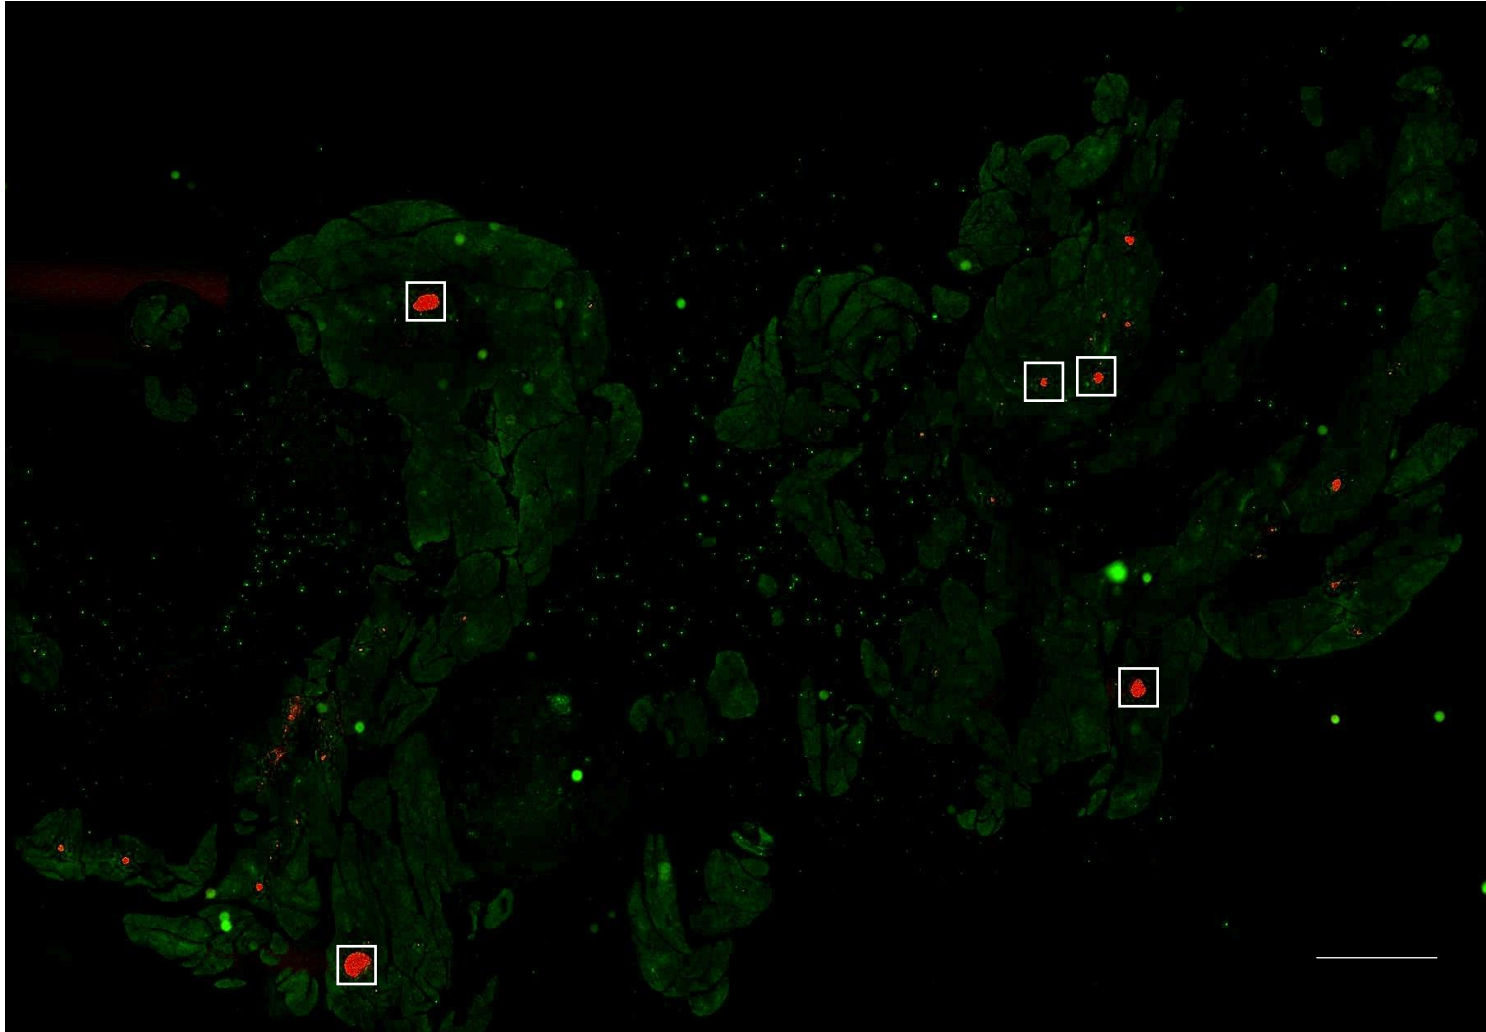

**Control2**

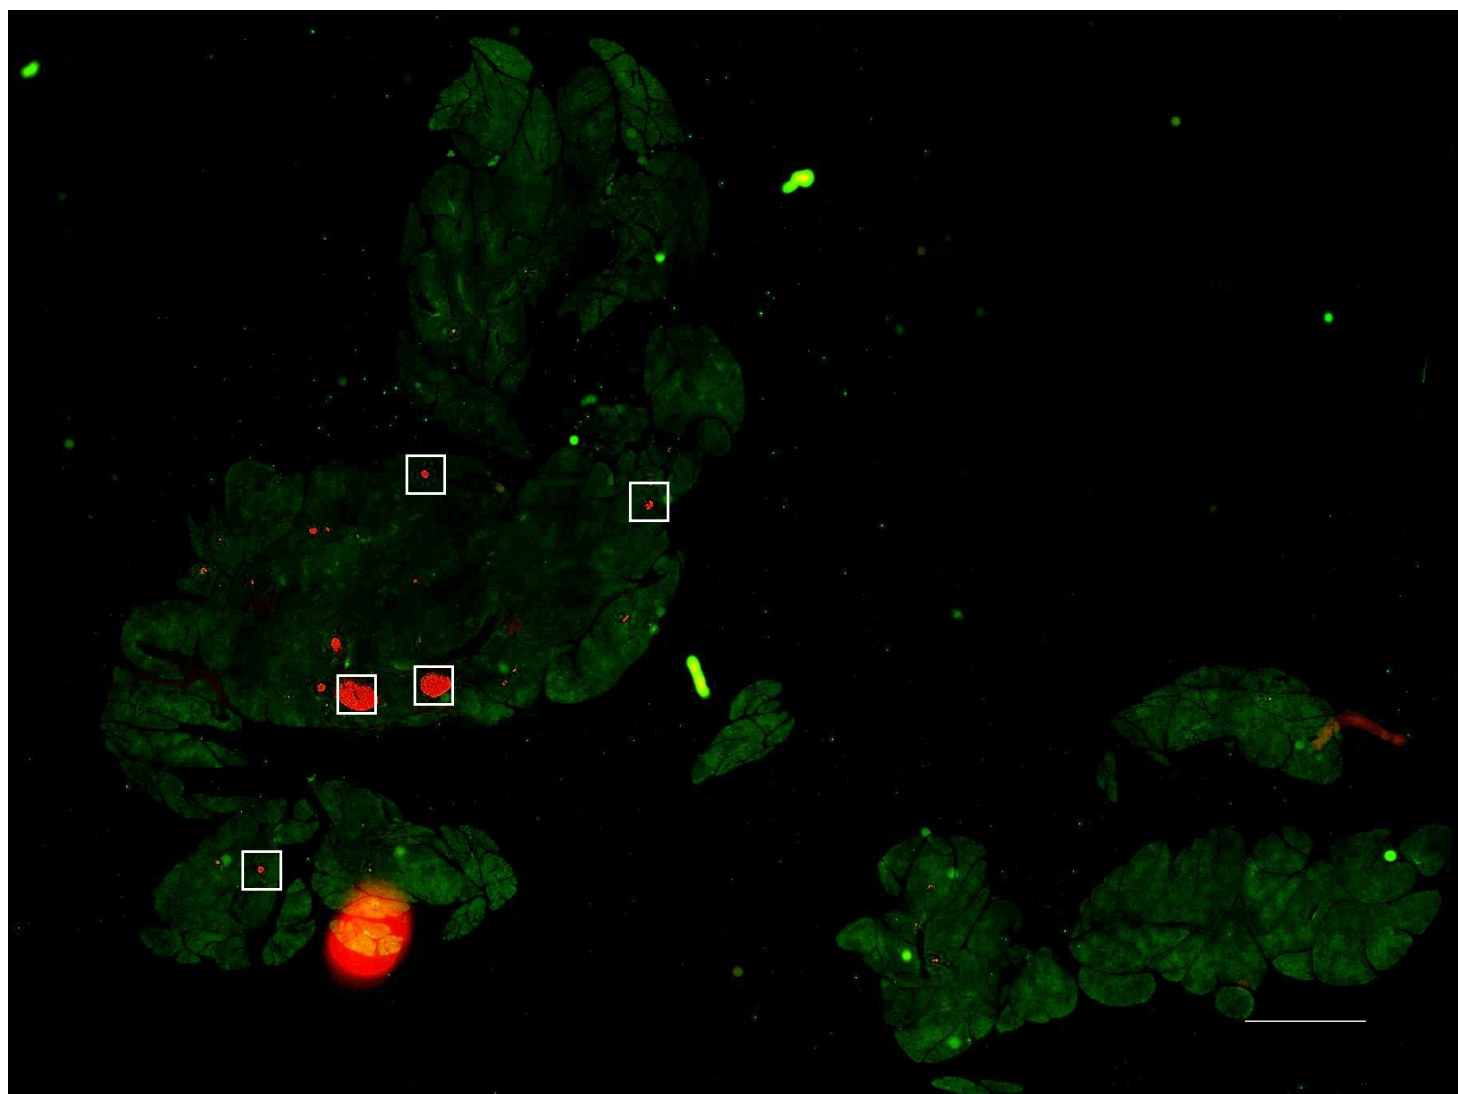

**Control3**

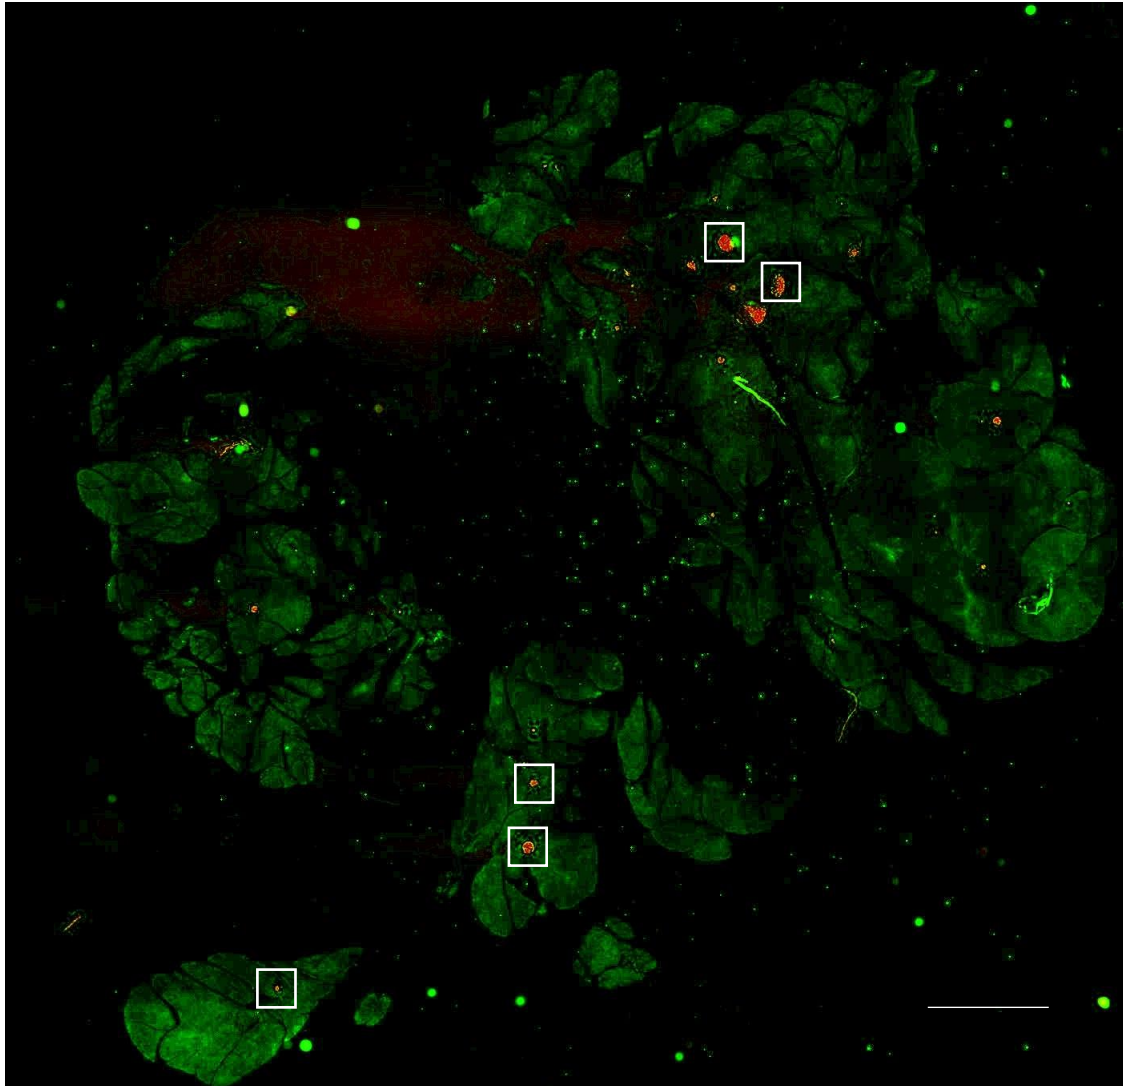

**MSC(-) 1**

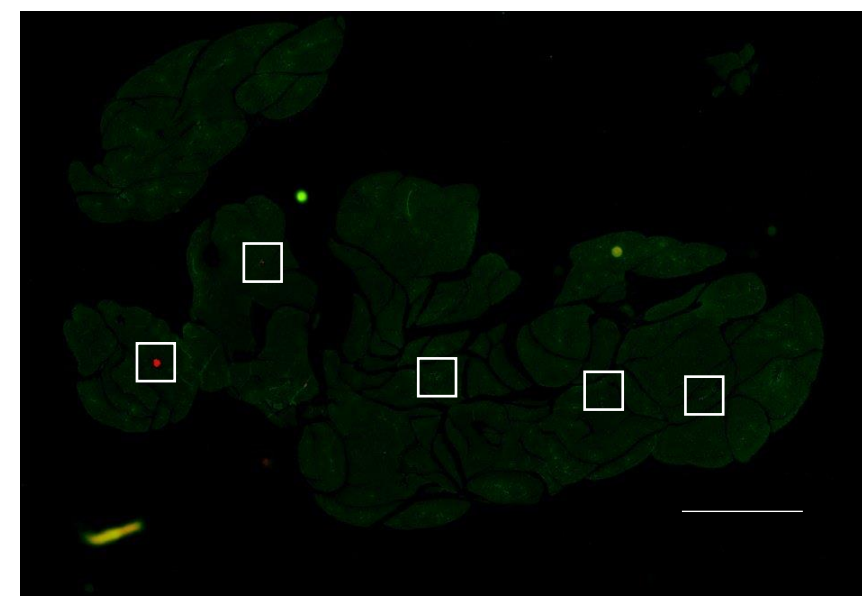

**MSC(-) 2**

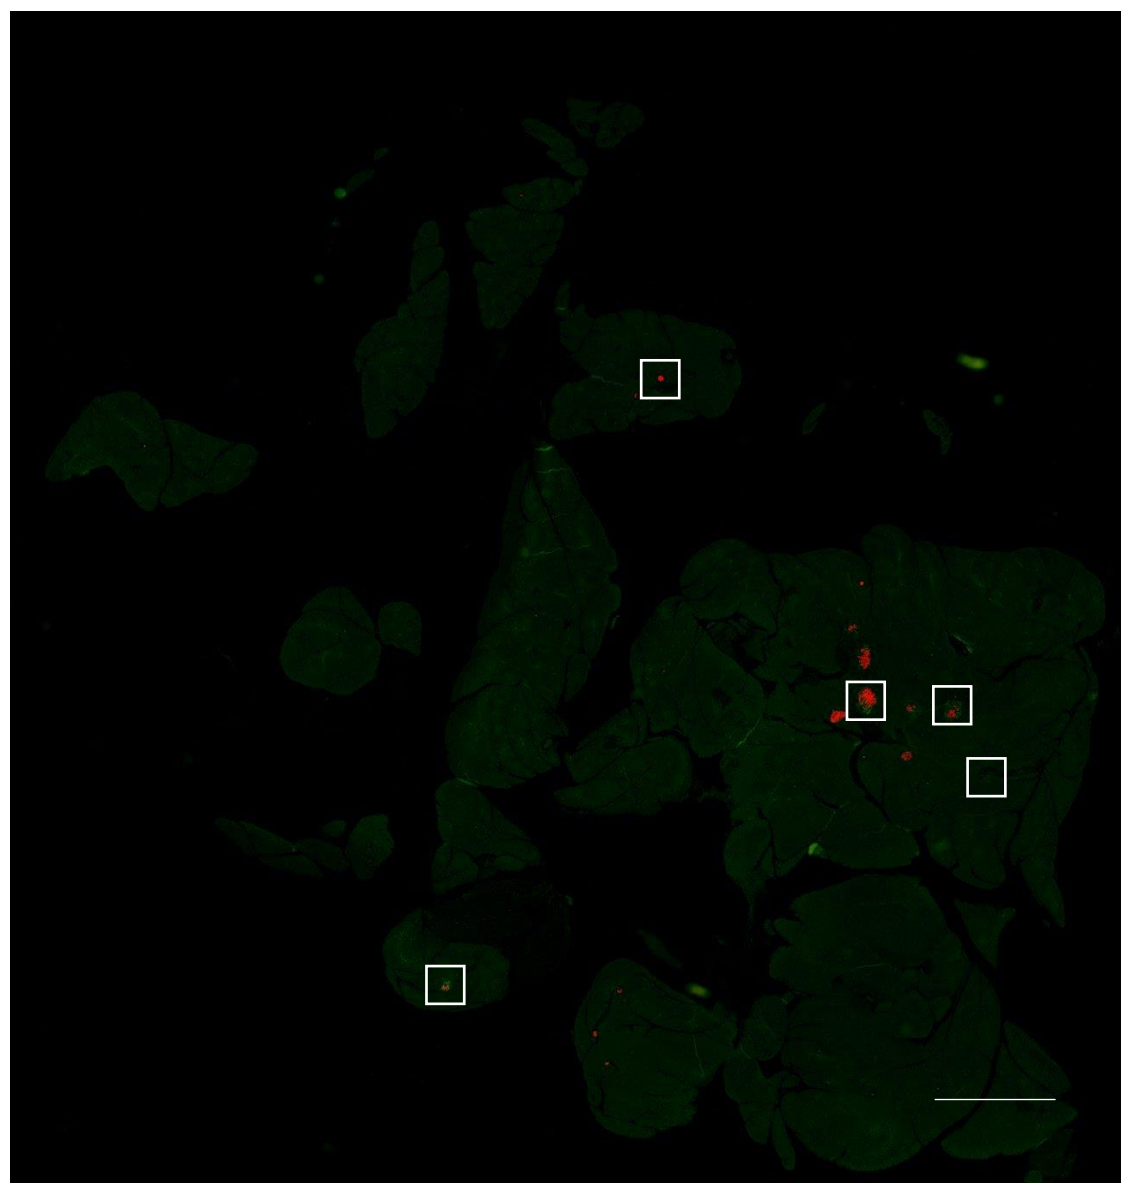

**MSC(-) 3**

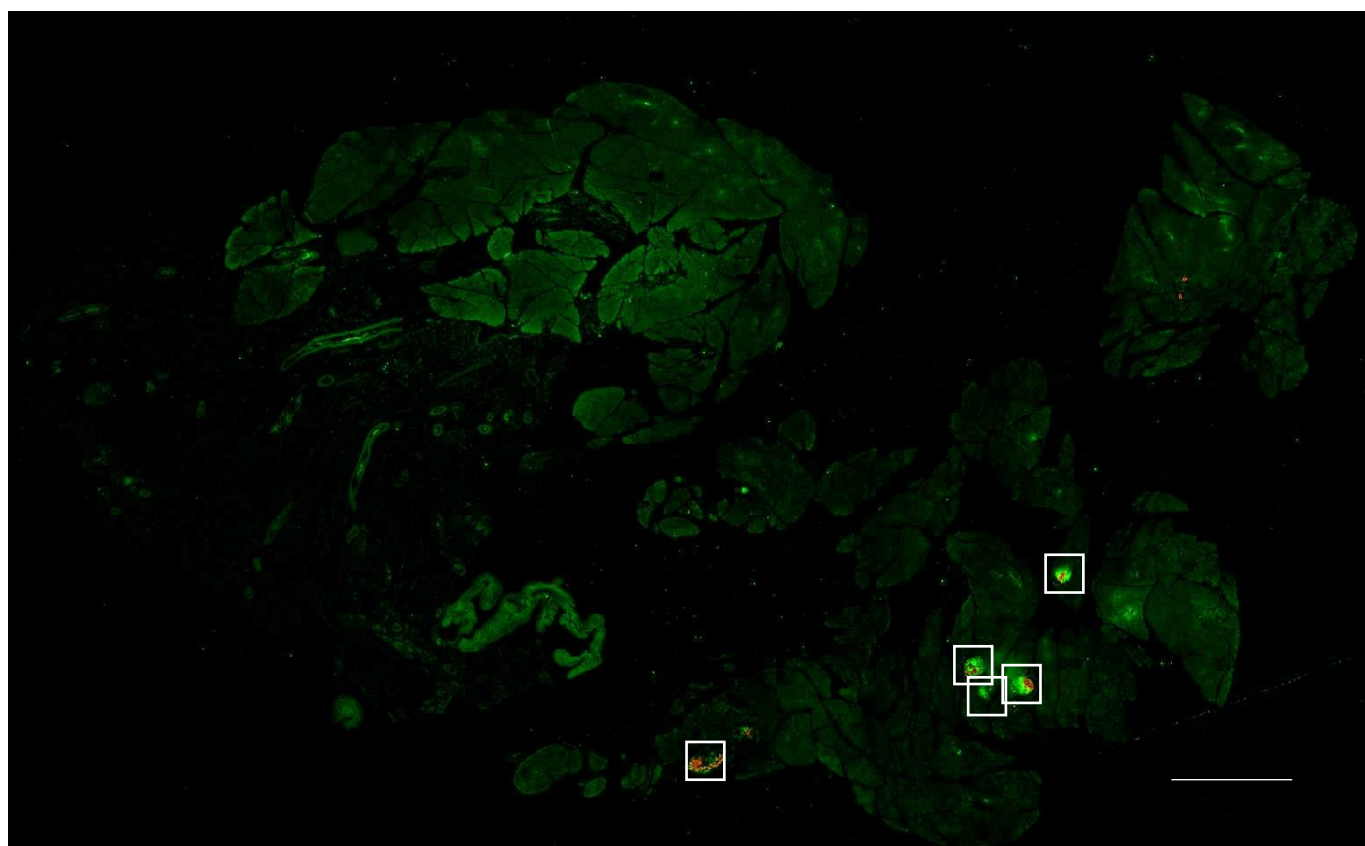

**MSC(+)** 1

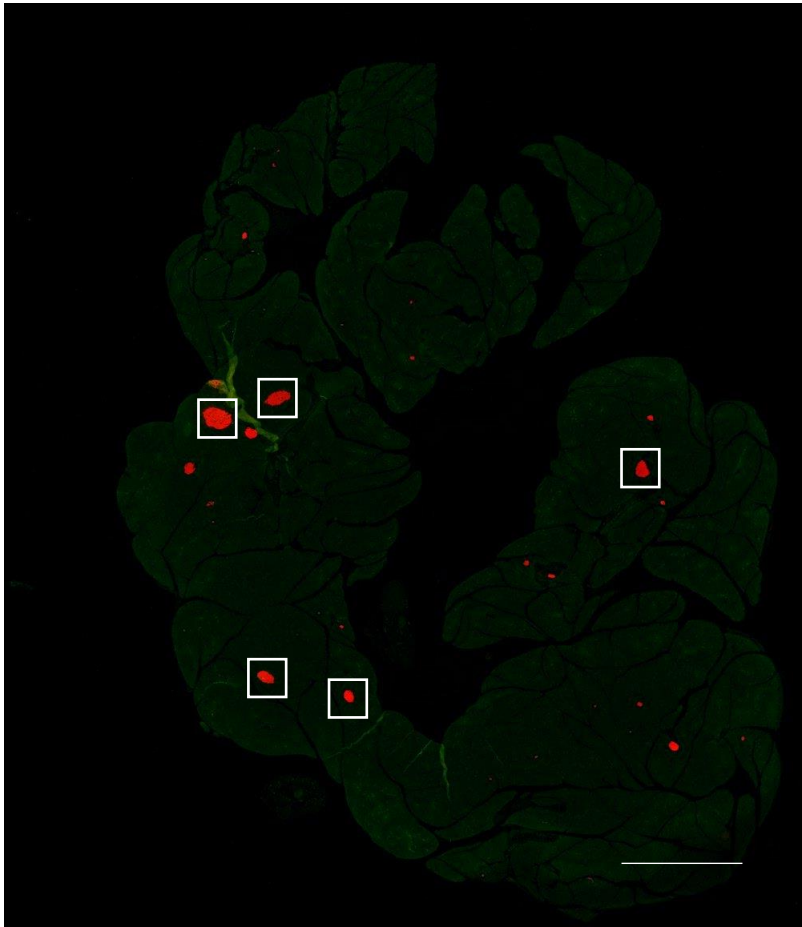

**MSC(+)** 2

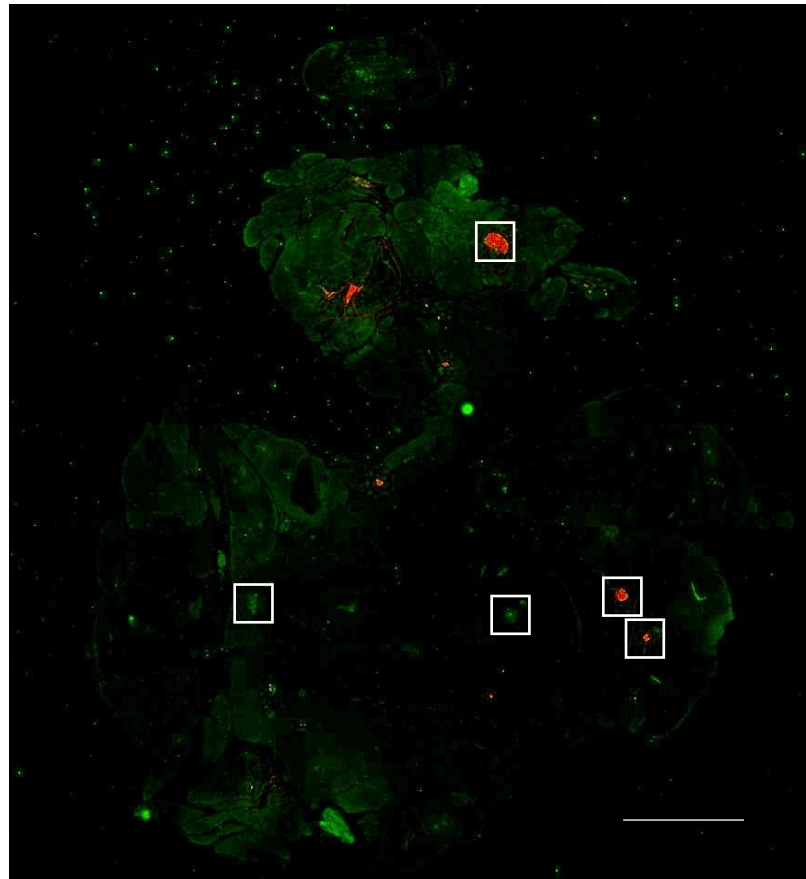

**MSC(+)** 3

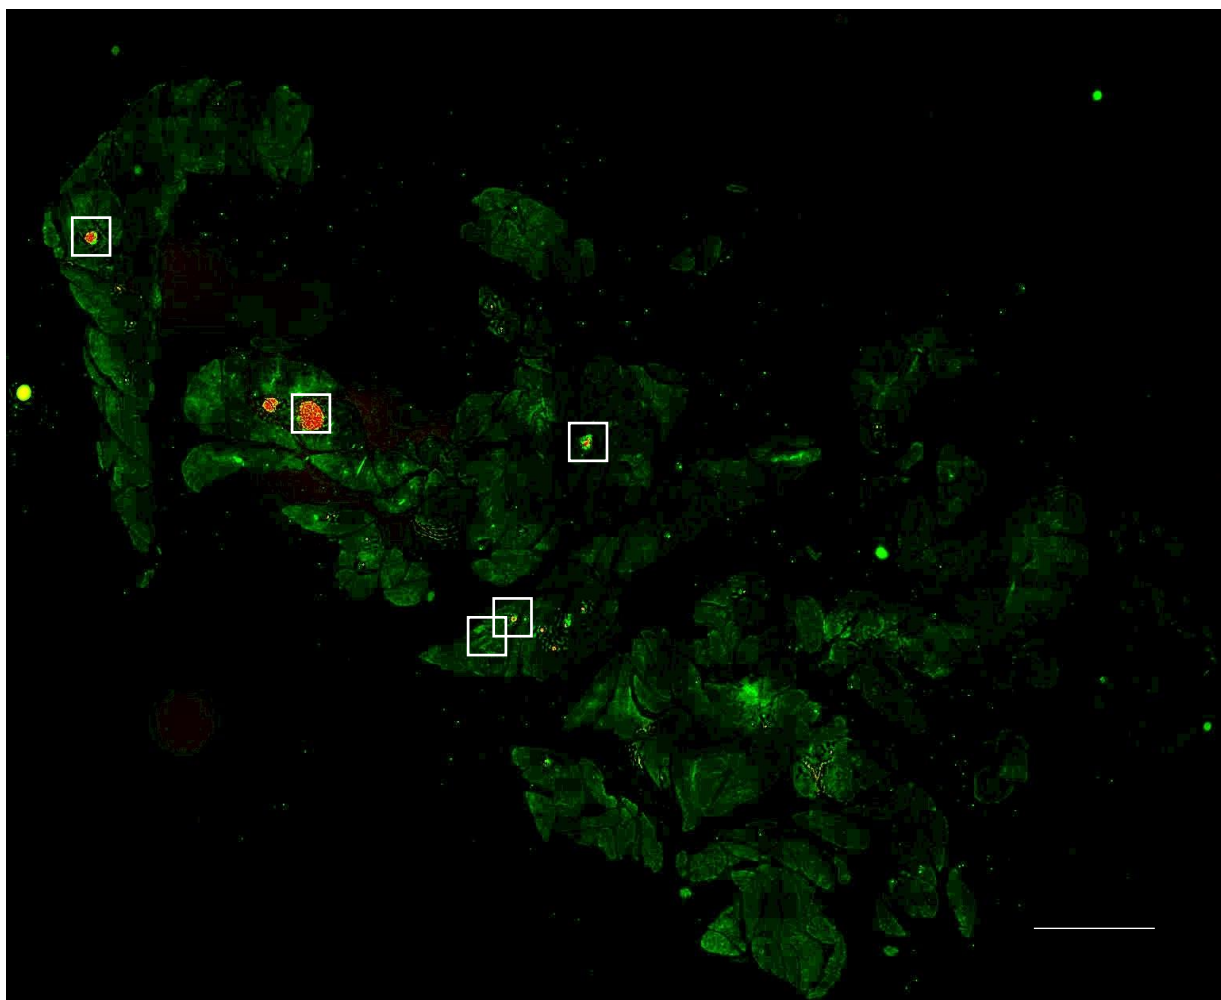

ESM Fig. 1. Macro images of islets used for quantitative evaluation of immunostaining.

Double immunofluorescence staining for (a) CD3 (green) and insulin (red), (b) Mac-2 (green) and insulin, and (c) CXCL9 (green) and insulin. Each location of the islets used for quantitative evaluation was indicated by a square. Scale bars, 1 mm. Control, NOD mice not receiving anti-PD-L1 mAb or hMSCs; MSC(-), NOD mice which received anti-PD-L1 mAb without hMSCs; MSC(+), NOD mice which received anti-PD-L1 mAb and hMSCs; Mac-2, Macrophage-2; CXCL9, C-X-C motif chemokine ligand 9

**a control**

**CXCL9/Insulin**

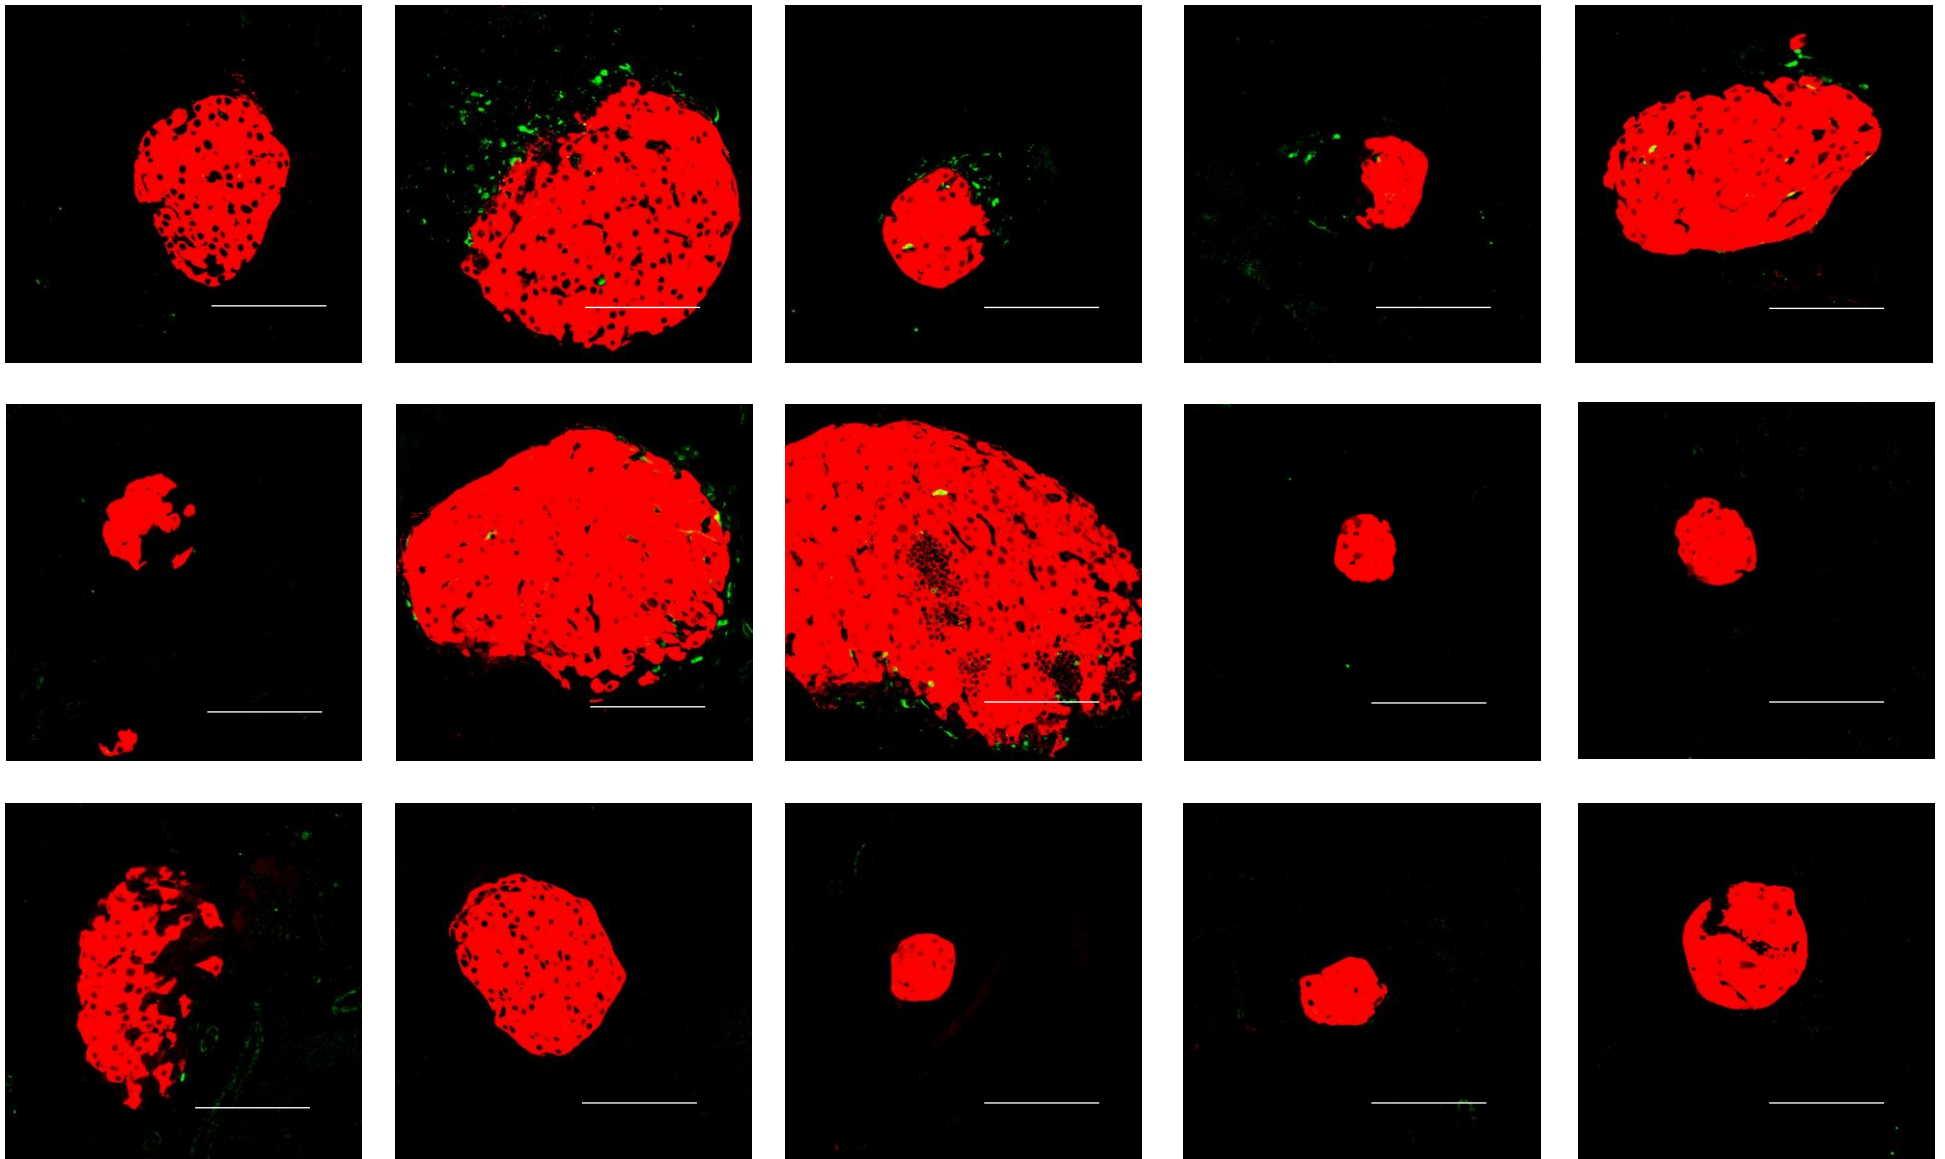

**b MSC(-)**

**CXCL9/Insulin**

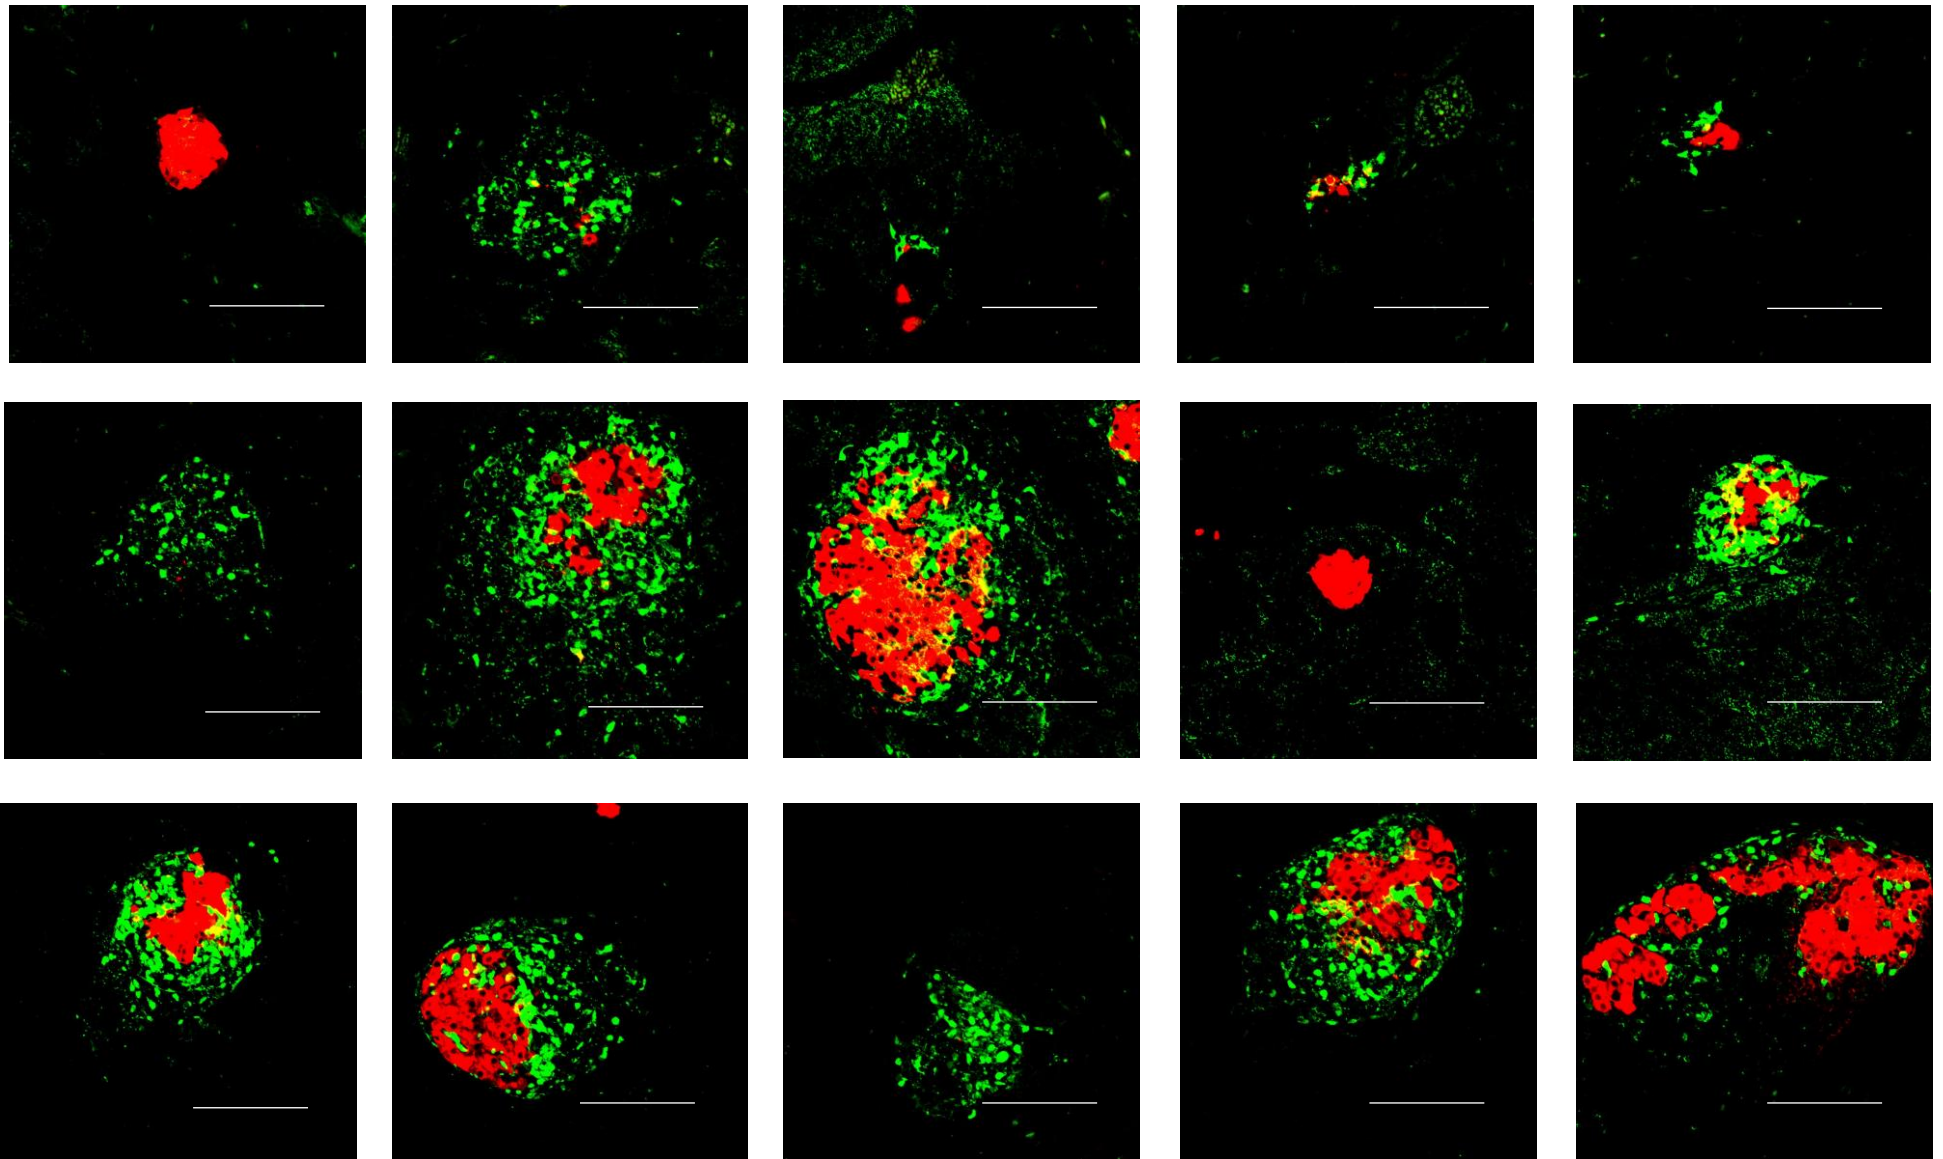

**c MSC(+)**

**CXCL9/Insulin**

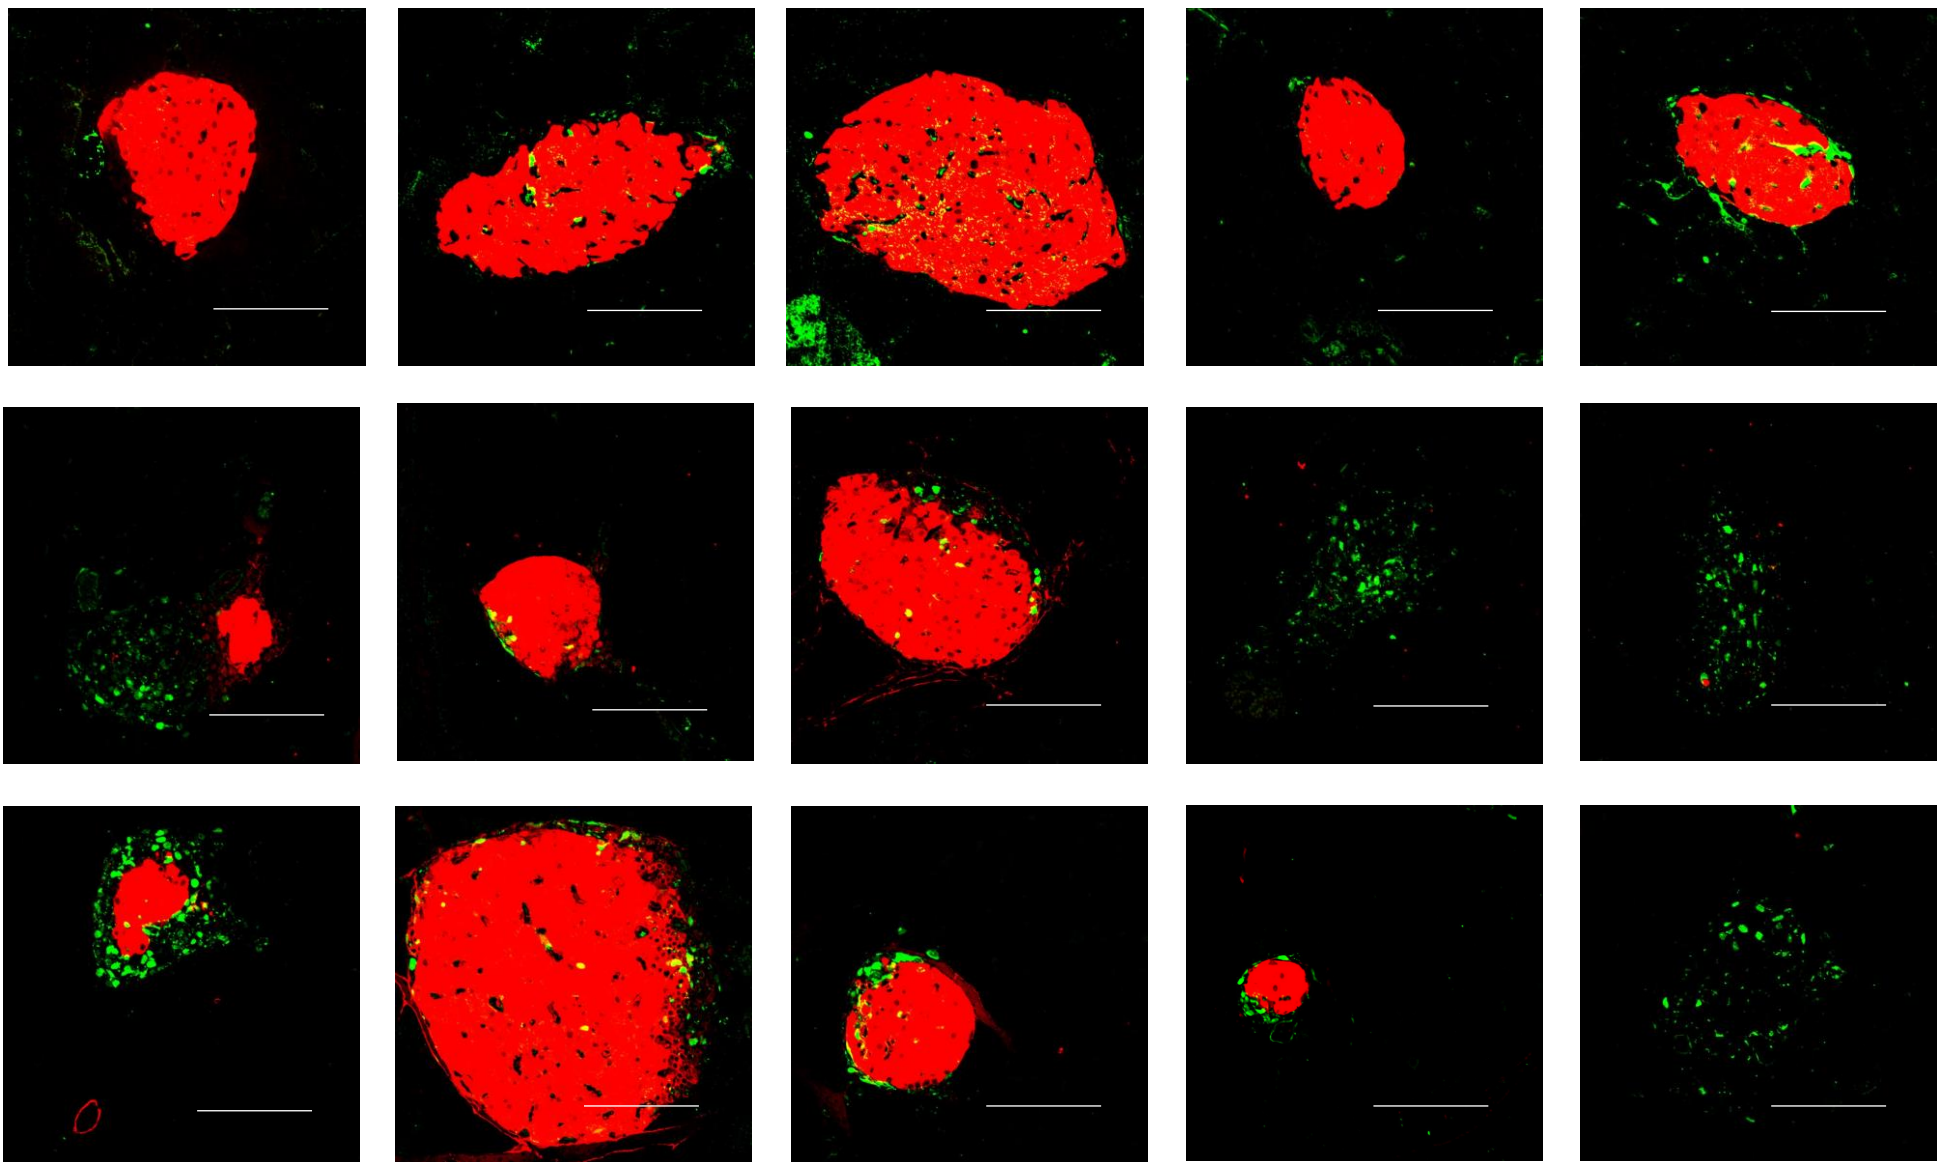

ESM Fig. 2. Enlarged images of the islets used for quantitative evaluation of immunostaining of CXCL9-positive macrophages.

Double immunofluorescence staining for CXCL9 (green) and insulin (red). (a) Islets from control group mice. (b) Islets from MSC(-) group mice. (c) Islets from MSC(+) group mice. Scale bars, 100 μm.



**a**

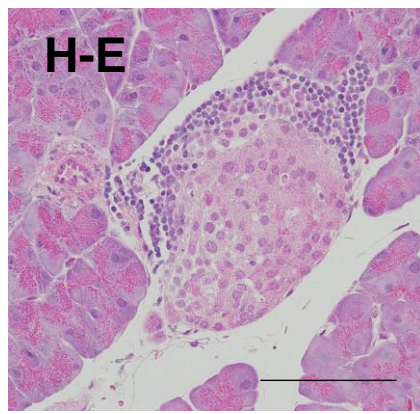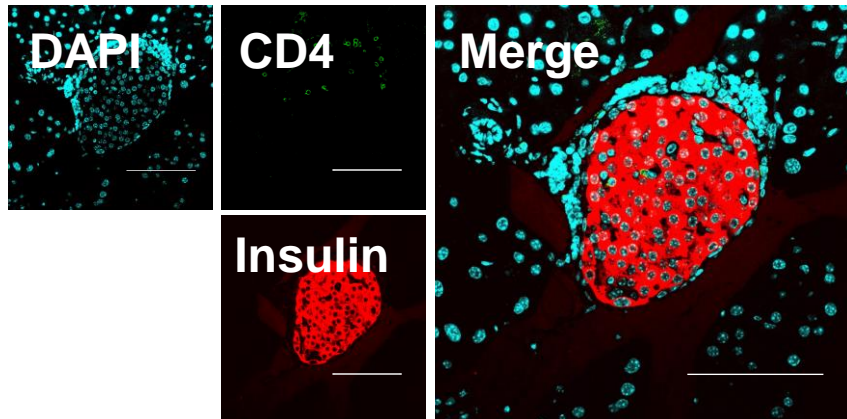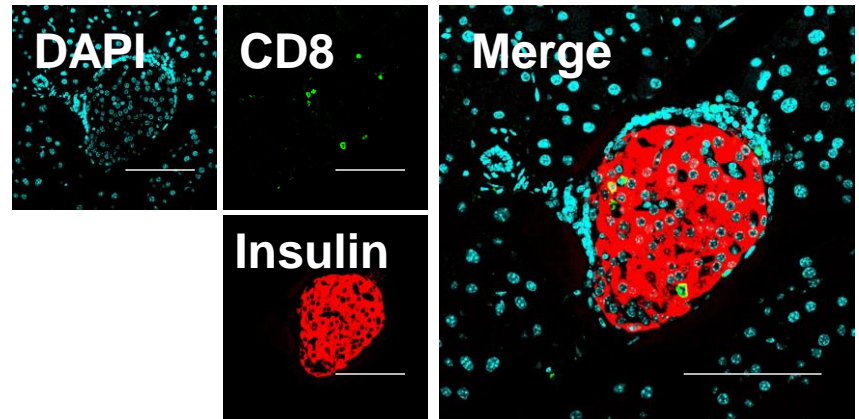

**b**

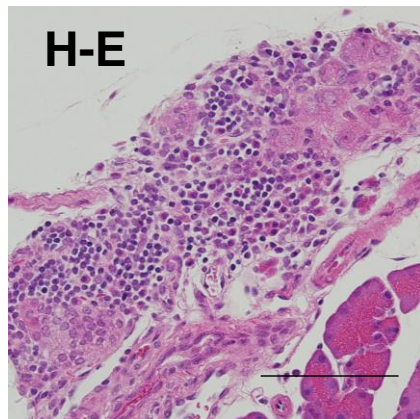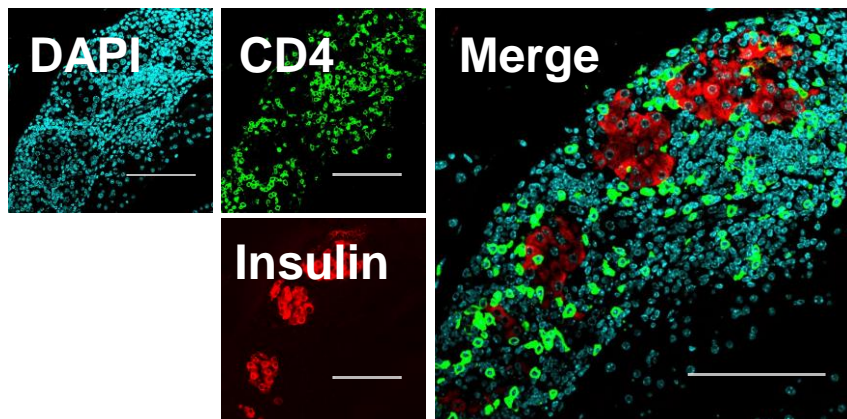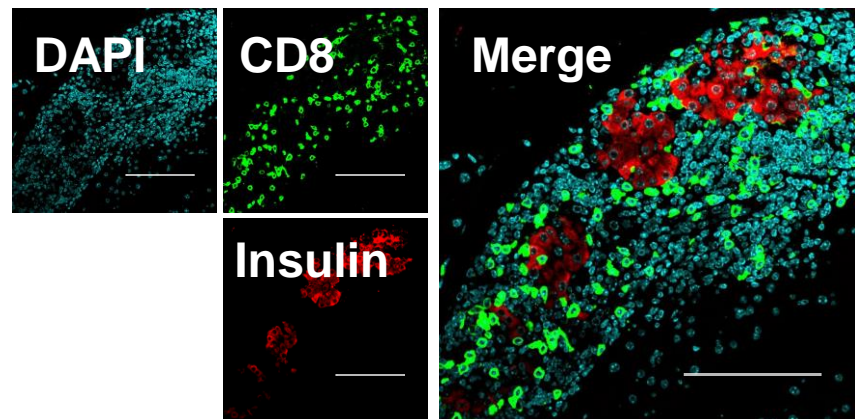

**c**

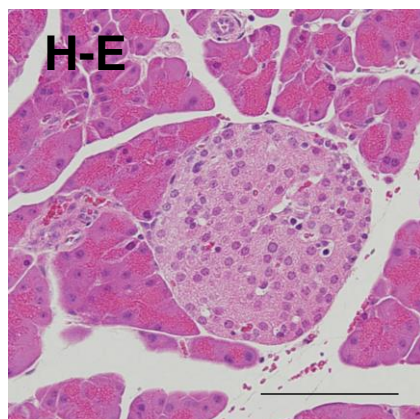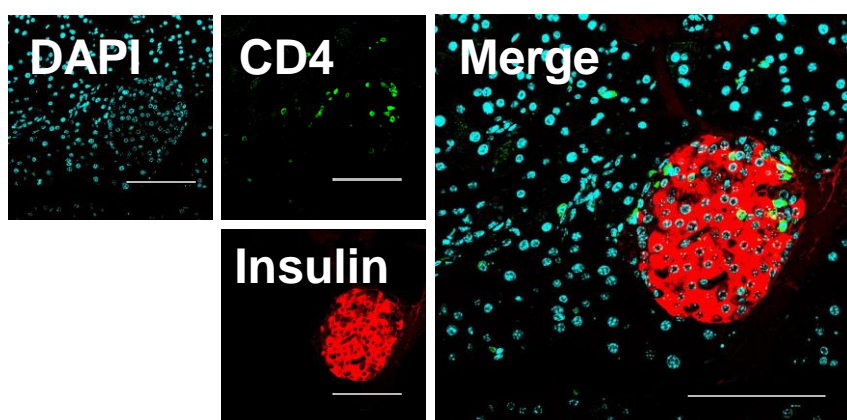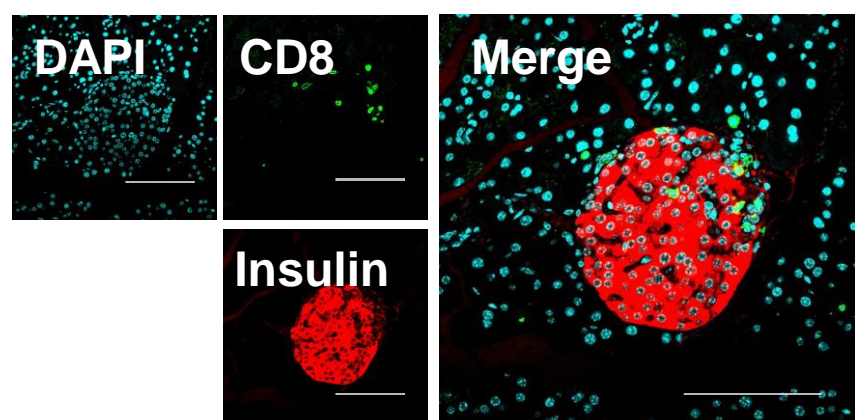

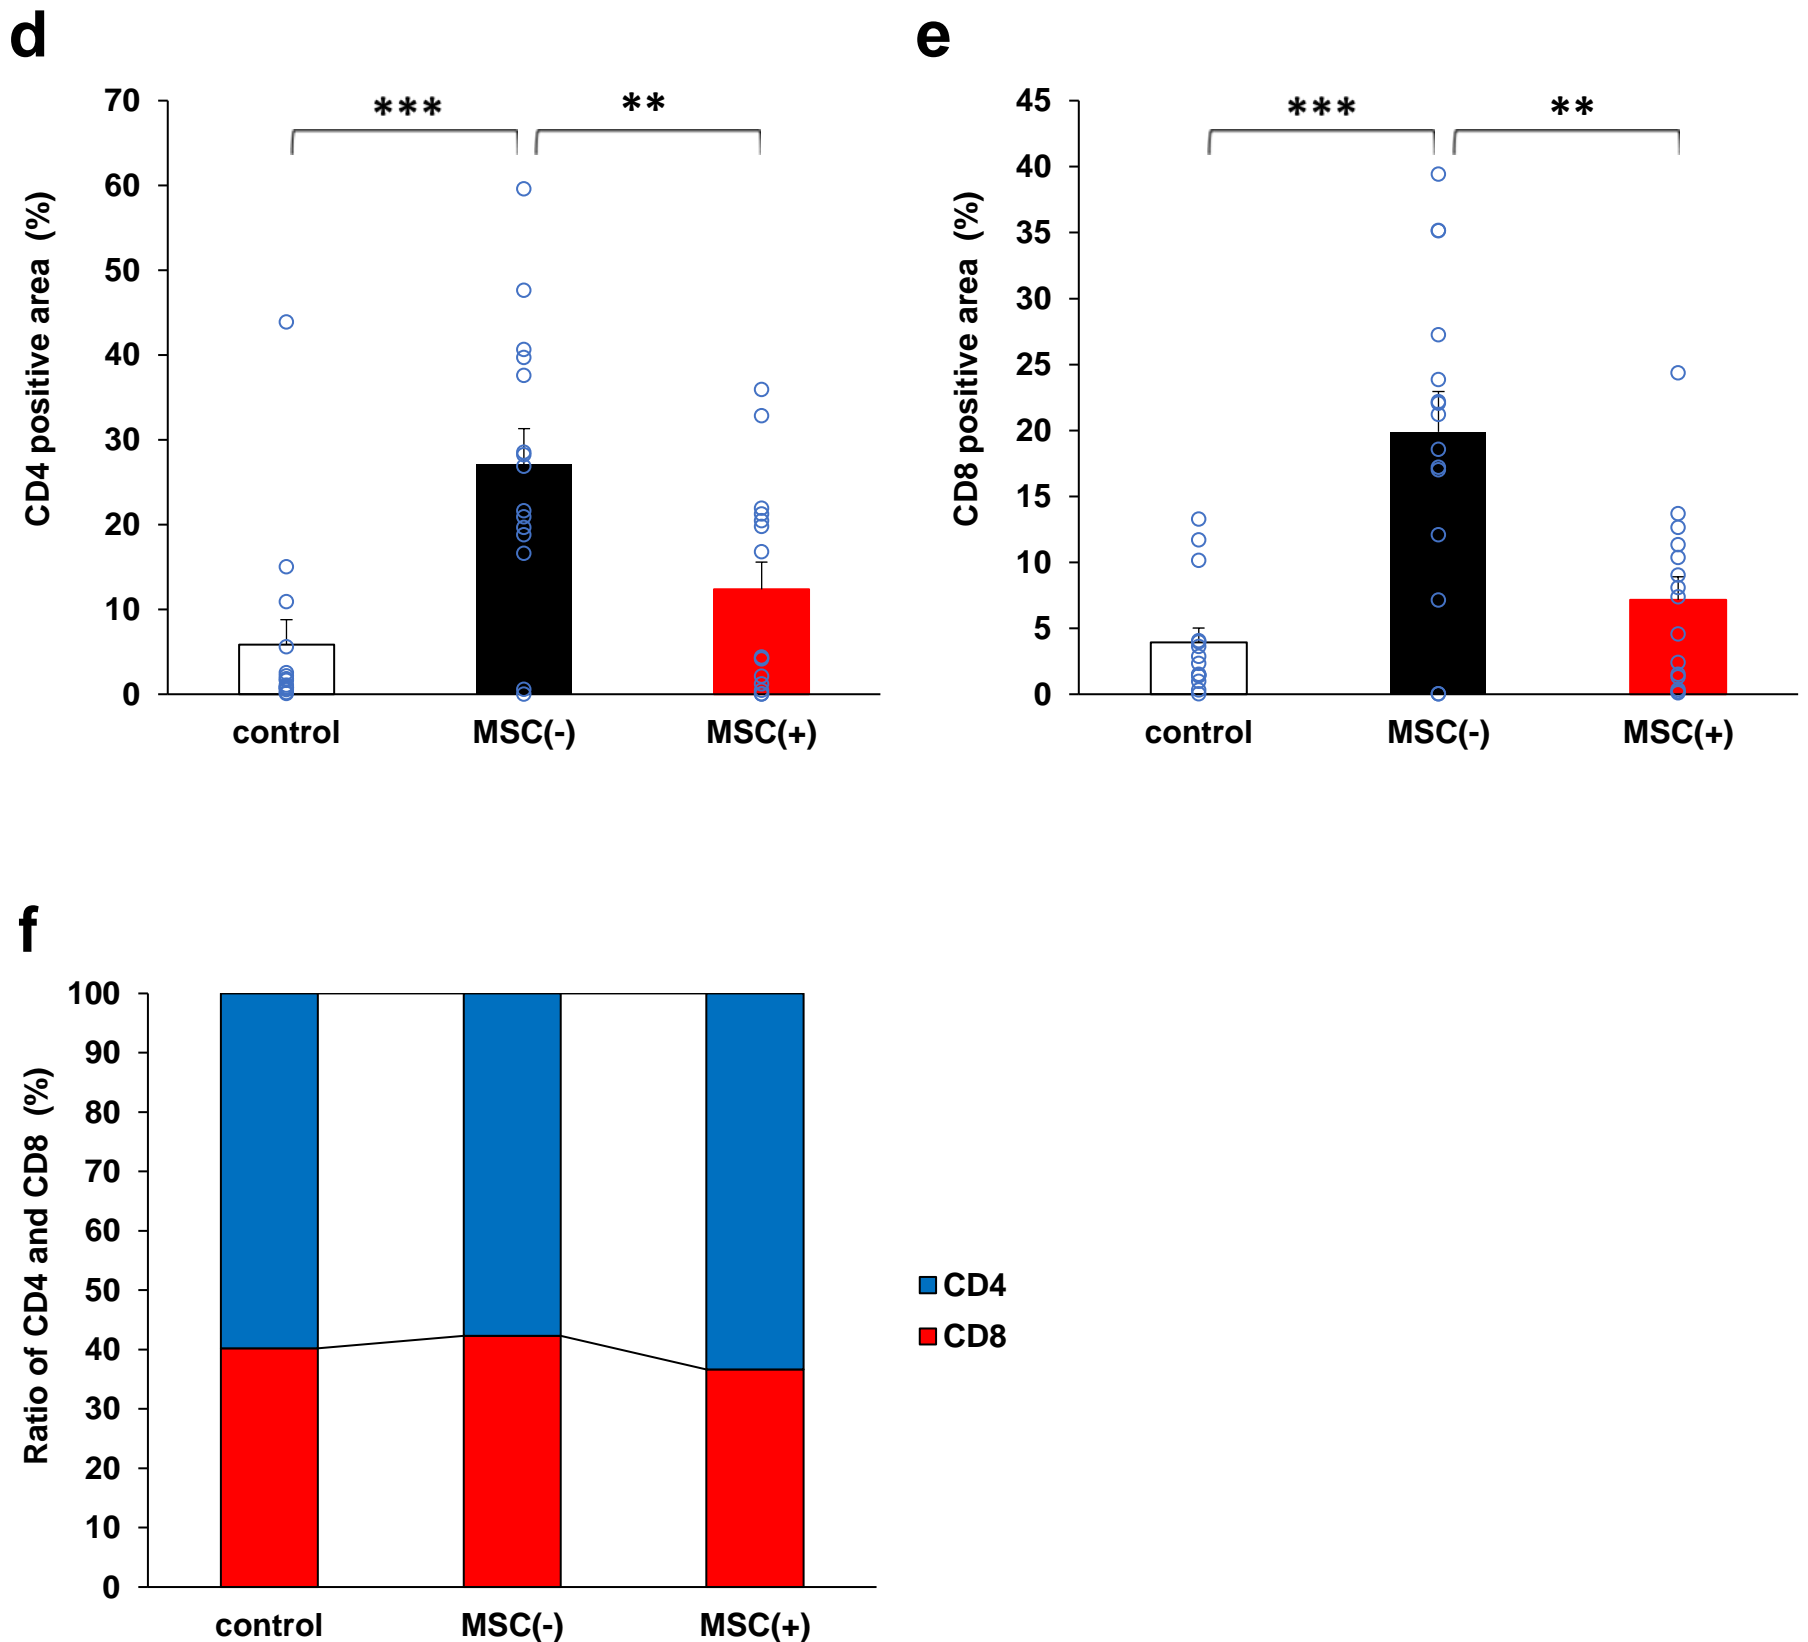

ESM Fig. 3. CD4 and CD8 infiltrations in the islets. (a) Pancreas from a mouse not receiving anti-PD-L1 mAb or hMSCs (control: normoglycemic, insulin content was 2.17 pmol/mg) (b) Pancreas from an MSC(-) mouse (diabetic, insulin content was 0.08 pmol/mg). (c) Pancreas from an MSC(+) mouse (normoglycemic, insulin content was 0.66 pmol/mg). (a-c) Each upper panel; Hematoxylin-Eosin staining. Lower left panels; triple immunofluorescence staining for DAPI (light blue), insulin (red), and CD4 (green), and their merge. Lower right panels; triple immunofluorescence staining for DAPI, insulin, and CD8 (green), and their merge. 2  $\mu$ m serial sections. Scale bars, 100  $\mu$ m. The pancreatic specimens of the three mice with insulin contents close to the average value in each group were selected as the group representatives. (d) CD4-positive area. (e) CD8-positive area. [control group islets:  $n=15$ ; MSC(-) group islets:  $n=15$ ; MSC(+) group islets:  $n=15$ ]. (f) Ratio of CD4 and CD8 in the same islets [control group islets:  $n=14$ ; MSC(-) group islets:  $n=11$ ; MSC(+) group islets:  $n=15$ ]. Data are shown as the mean  $\pm$  S.E.M.  $**p < 0.01$ ;  $***p < 0.001$  between the indicated two groups by Student's  $t$ -test.

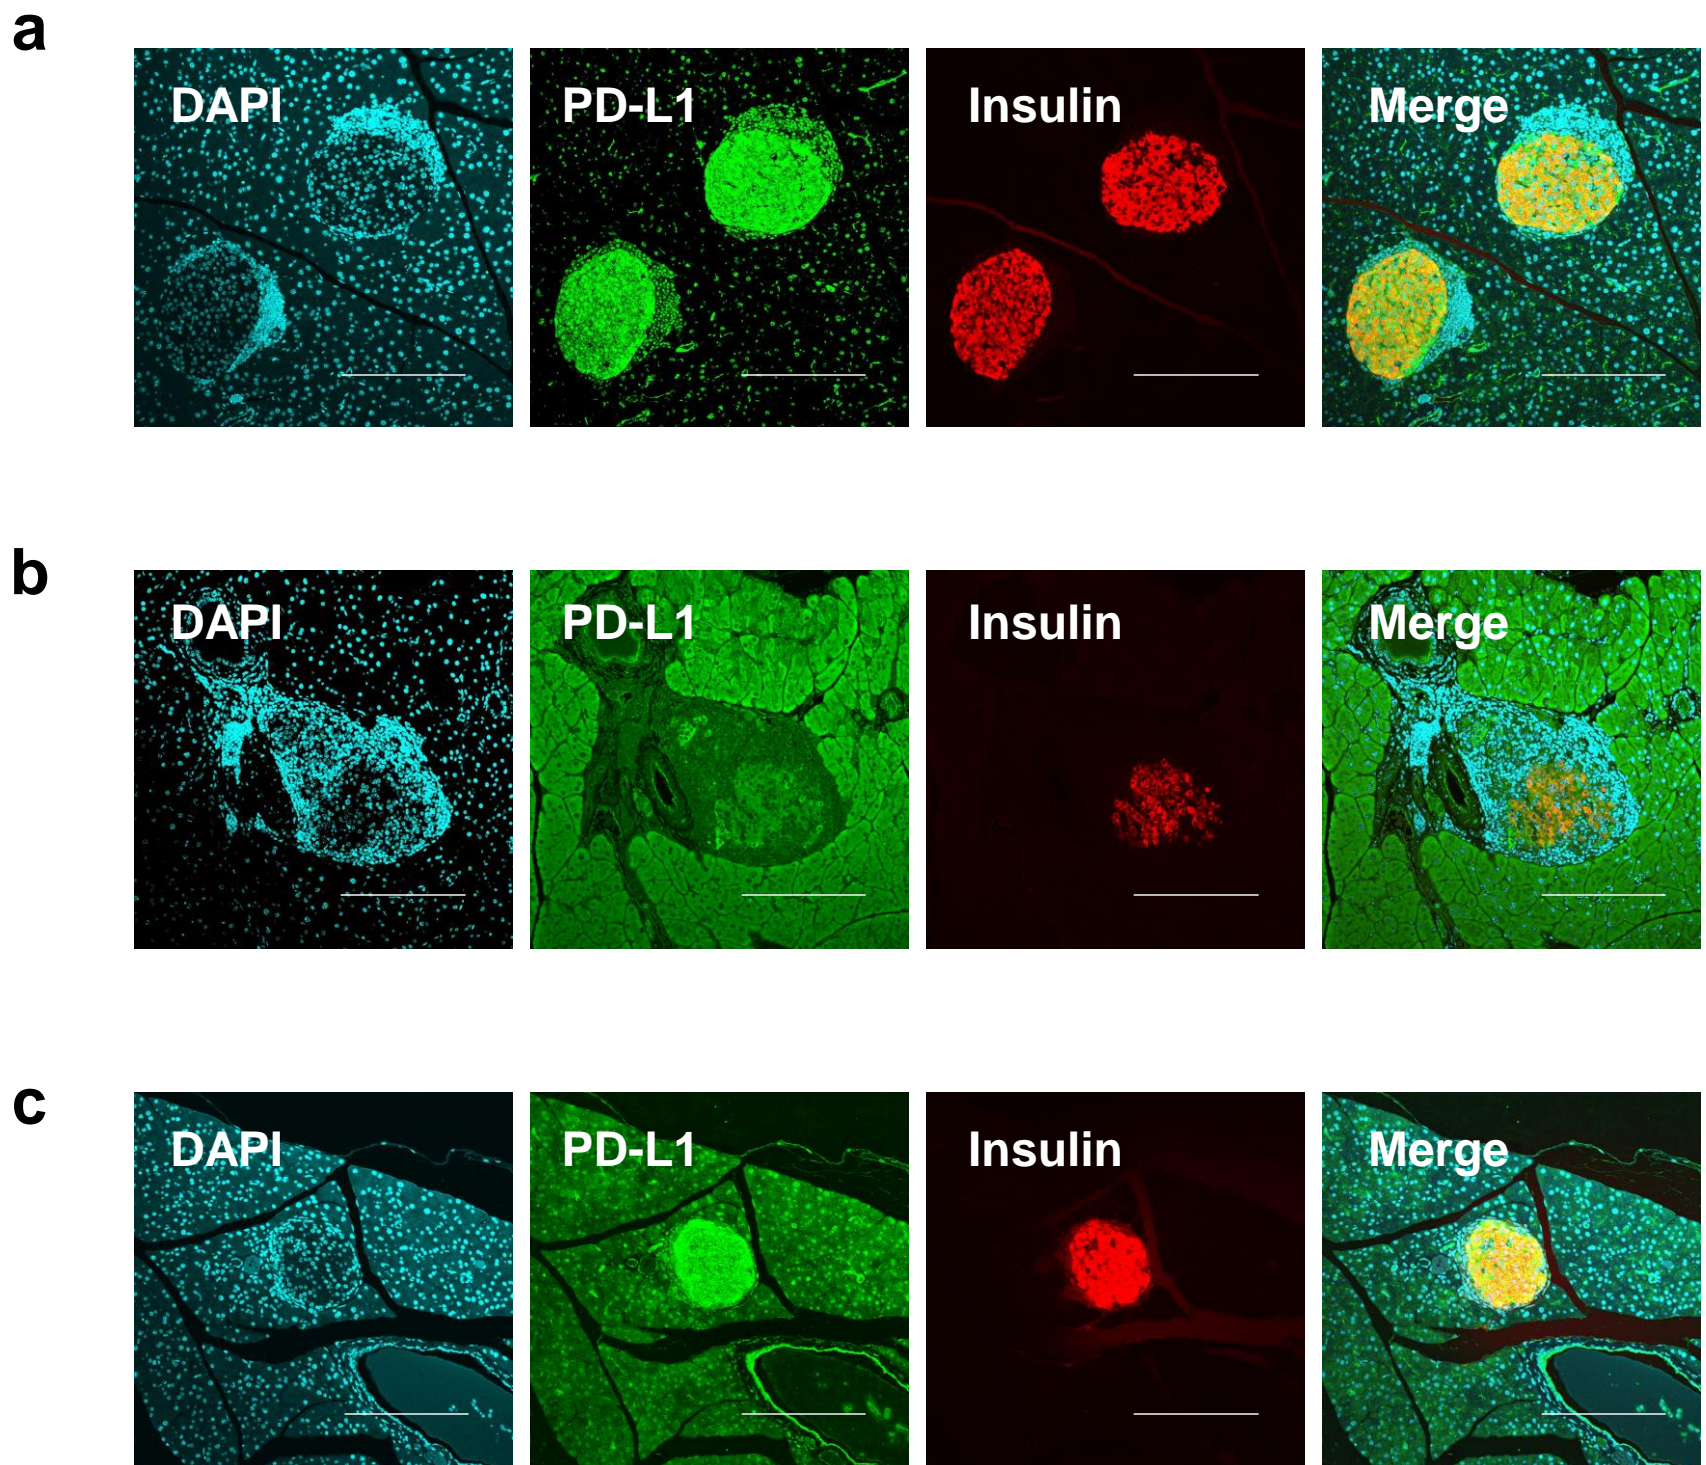

ESM Fig. 4. Representative immunostaining of PD-L1 in the pancreas of NOD mice. Triple immunofluorescence staining for DAPI (light blue), insulin (red), and PD-L1 (green), and their merge (a-c). (a) Pancreas from a mouse not receiving anti-PD-L1 mAb or hMSCs (control: normoglycemic, insulin content was 2.17 pmol/mg). (b) Pancreas from an MSC(-) mouse (normoglycemic, insulin content was 0.41 pmol/mg). (c) Pancreas from an MSC(+) mouse (normoglycemic, insulin content was 1.00 pmol/mg). Scale bars, 100  $\mu$ m.
